# Supplementary material for: Combining UAV-based hyperspectral imagery and machine learning algorithms for soil moisture content monitoring
Source: PeerJ. 2019 May 3;7:e6926. doi: 10.7717/peerj.6926 (PMC6501779; doi:10.7717/peerj.6926)
Supplement: Supplemental Information 10 — Reflectance of samples (n = 70) [file peerj-07-6926-s010.xlsx]

## Sheet: Sheet1
Lat				44.354	44.354	44.354	44.354	44.354	44.354	44.354	44.3539	44.3539	44.3539	44.3539	44.3539	44.3539	44.3539	44.3537	44.3537	44.3537	44.3537	44.3537	44.3537	44.3537	44.3535	44.3535	44.3535	44.3535	44.3535	44.3535	44.3535	44.3533	44.3533	44.3533	44.3533	44.3533	44.3533	44.3533	44.3531	44.3531	44.3531	44.3531	44.3531	44.3531	44.3531	44.3529	44.3529	44.3529	44.3529
Lon				87.8537	87.8538	87.854	87.8541	87.8543	87.8544	87.8546	87.8537	87.8538	87.854	87.8541	87.8543	87.8544	87.8546	87.8537	87.8538	87.854	87.8541	87.8543	87.8544	87.8546	87.8537	87.8538	87.854	87.8541	87.8543	87.8544	87.8546	87.8537	87.8538	87.854	87.8541	87.8543	87.8544	87.8546	87.8537	87.8538	87.854	87.8541	87.8543	87.8544	87.8546	87.8537	87.8538	87.854	87.8541
B1	399.525	0.1975	0.00688841	0.2021	0.1966	0.1869	0.2076	0.1951	0.2021	0.1912	0.2068	0.1901	0.2042	0.1984	0.195	0.1982	0.1906	0.191	0.1882	0.2004	0.205	0.2012	0.197	0.2008	0.1987	0.1932	0.1946	0.1991	0.1892	0.1926	0.1986	0.2057	0.206	0.1909	0.2173	0.1929	0.1931	0.1951	0.1946	0.2155	0.1927	0.199	0.1899	0.1945	0.1967	0.1868	0.1945	0.1961	0.1954
B2	401.746	0.194363	0.00701584	0.1999	0.1931	0.1828	0.2046	0.193	0.1979	0.1865	0.2038	0.187	0.1989	0.194	0.1919	0.1932	0.1875	0.1889	0.1851	0.1963	0.2016	0.1989	0.1946	0.1964	0.1982	0.1896	0.1906	0.1969	0.1876	0.189	0.1959	0.2034	0.2018	0.1872	0.2118	0.1912	0.189	0.1918	0.1914	0.2142	0.1918	0.1955	0.1866	0.1911	0.1938	0.1856	0.1914	0.1923	0.1927
B3	403.967	0.190414	0.00727984	0.1966	0.1893	0.1786	0.2011	0.1898	0.1928	0.181	0.1997	0.1827	0.1927	0.1884	0.1866	0.1865	0.183	0.186	0.1809	0.1922	0.1967	0.1953	0.1921	0.1914	0.1969	0.1862	0.1856	0.1929	0.1846	0.1845	0.1928	0.2004	0.1983	0.1844	0.2055	0.1878	0.1852	0.1872	0.1854	0.2119	0.19	0.1923	0.1829	0.1879	0.1905	0.1824	0.189	0.1884	0.1893
B4	406.188	0.183796	0.00763547	0.1904	0.1822	0.1719	0.1957	0.184	0.1856	0.1727	0.1925	0.1764	0.1849	0.1803	0.1789	0.1784	0.1759	0.18	0.174	0.1846	0.1902	0.1889	0.1861	0.1842	0.1919	0.1785	0.1787	0.1872	0.1784	0.1775	0.1856	0.1951	0.1919	0.1791	0.1978	0.1818	0.1787	0.181	0.1778	0.2071	0.1854	0.186	0.1764	0.1818	0.1835	0.1776	0.1839	0.1821	0.1834
B5	408.409	0.176204	0.00801781	0.1825	0.1741	0.1641	0.1899	0.1767	0.1774	0.1637	0.184	0.1689	0.1766	0.1711	0.1695	0.169	0.1681	0.1732	0.1667	0.1762	0.1822	0.1823	0.1788	0.1772	0.185	0.1721	0.1698	0.1796	0.1698	0.1709	0.1776	0.1882	0.1845	0.1729	0.1901	0.174	0.1713	0.1736	0.1691	0.2002	0.1797	0.1788	0.1684	0.1751	0.1754	0.1714	0.1782	0.1765	0.1757
B6	410.63	0.167086	0.00849326	0.1718	0.1652	0.1538	0.1823	0.1683	0.1684	0.1547	0.1751	0.16	0.1671	0.1613	0.1593	0.1595	0.1593	0.1642	0.1579	0.1667	0.1728	0.1748	0.1697	0.1693	0.1764	0.1646	0.1599	0.1692	0.1592	0.163	0.1683	0.18	0.1749	0.1639	0.1822	0.164	0.161	0.1648	0.1587	0.1928	0.1716	0.1702	0.1583	0.1664	0.1652	0.1622	0.1693	0.1686	0.1665
B7	412.851	0.158923	0.00879112	0.1611	0.1575	0.1449	0.1752	0.1602	0.1602	0.1474	0.1668	0.1521	0.1592	0.1535	0.1514	0.1521	0.1507	0.1569	0.1491	0.1575	0.1648	0.169	0.1609	0.1627	0.1661	0.1575	0.1515	0.1605	0.1495	0.1566	0.1598	0.1718	0.1673	0.1556	0.1765	0.1551	0.1521	0.1576	0.1502	0.1849	0.1638	0.1638	0.15	0.1576	0.156	0.1531	0.1602	0.1612	0.1579
B8	415.072	0.149067	0.00885907	0.151	0.1489	0.1341	0.1645	0.1505	0.1511	0.1392	0.1564	0.142	0.1493	0.1434	0.1408	0.1423	0.1401	0.1472	0.14	0.1481	0.153	0.1629	0.1514	0.1532	0.1546	0.1475	0.1424	0.1502	0.1391	0.1469	0.1496	0.1626	0.1568	0.1466	0.1668	0.1452	0.142	0.148	0.139	0.1743	0.1528	0.1544	0.1394	0.1487	0.146	0.1419	0.1509	0.1522	0.1473
B9	417.293	0.141529	0.00873416	0.1433	0.143	0.1275	0.1566	0.1444	0.1449	0.1321	0.1478	0.1349	0.1411	0.1355	0.134	0.136	0.1325	0.1389	0.1327	0.1413	0.1449	0.1562	0.1451	0.1449	0.1449	0.1392	0.1357	0.1415	0.1312	0.1386	0.1435	0.154	0.15	0.1381	0.1604	0.1389	0.1345	0.1412	0.1304	0.1671	0.1449	0.1469	0.1324	0.1402	0.139	0.1329	0.1431	0.1455	0.141
B10	419.514	0.134313	0.0086745	0.1355	0.1366	0.1214	0.1497	0.1367	0.1386	0.1243	0.1404	0.1281	0.1336	0.1282	0.1269	0.1287	0.1254	0.1334	0.1265	0.1345	0.1385	0.1507	0.14	0.137	0.1381	0.1313	0.1293	0.1354	0.125	0.13	0.1352	0.1462	0.1414	0.1303	0.1535	0.1312	0.1269	0.1337	0.1236	0.1598	0.136	0.1393	0.1255	0.1333	0.1321	0.1247	0.1367	0.1391	0.1331
B11	421.736	0.131446	0.00843108	0.1329	0.135	0.1187	0.1456	0.1345	0.1363	0.1222	0.136	0.1254	0.1316	0.1253	0.1248	0.1253	0.1232	0.1303	0.1237	0.1315	0.1356	0.1462	0.1378	0.1341	0.1335	0.1287	0.128	0.1329	0.1237	0.1268	0.1334	0.1421	0.1388	0.1272	0.1496	0.1279	0.1231	0.1316	0.121	0.1558	0.1322	0.1371	0.1233	0.1309	0.1284	0.1212	0.1329	0.1363	0.13
B12	423.957	0.129246	0.00838252	0.1302	0.134	0.116	0.1428	0.132	0.1348	0.1207	0.1349	0.1219	0.1295	0.1234	0.1236	0.1228	0.121	0.1279	0.1219	0.1305	0.1345	0.1437	0.1361	0.1314	0.1323	0.125	0.126	0.1308	0.1234	0.1249	0.1313	0.1403	0.136	0.1253	0.1472	0.1267	0.1201	0.1283	0.1199	0.153	0.1301	0.133	0.1218	0.1276	0.1252	0.1196	0.1307	0.133	0.1282
B13	426.178	0.128349	0.00828133	0.1295	0.1341	0.1159	0.1412	0.1316	0.1338	0.1202	0.134	0.1202	0.1291	0.1222	0.1217	0.1214	0.1198	0.1262	0.1216	0.1312	0.1346	0.1412	0.1357	0.1299	0.1315	0.1237	0.1253	0.13	0.1241	0.1236	0.1308	0.1394	0.1358	0.1258	0.1449	0.1257	0.1189	0.1268	0.1185	0.1513	0.1289	0.1318	0.1213	0.1268	0.1247	0.1177	0.1317	0.1314	0.1279
B14	428.399	0.125894	0.0081345	0.1279	0.1314	0.1147	0.1394	0.1298	0.1316	0.1173	0.1308	0.1183	0.1282	0.1192	0.1191	0.1185	0.1163	0.1226	0.1205	0.1286	0.1336	0.1369	0.1318	0.1281	0.1288	0.12	0.1232	0.1287	0.1227	0.1205	0.1283	0.1366	0.1327	0.1232	0.1414	0.124	0.1157	0.1243	0.1172	0.1491	0.1264	0.1283	0.1187	0.1241	0.1224	0.1164	0.1307	0.1286	0.1265
B15	430.62	0.124254	0.00826618	0.127	0.1296	0.1127	0.1383	0.1286	0.1298	0.1147	0.1283	0.1166	0.1272	0.1175	0.1171	0.1167	0.1139	0.1208	0.1197	0.1281	0.1324	0.1344	0.1294	0.1275	0.127	0.1191	0.12	0.1279	0.1201	0.1197	0.1263	0.1345	0.1313	0.1217	0.1392	0.1213	0.1138	0.1216	0.116	0.1479	0.1247	0.1262	0.1162	0.1222	0.1209	0.1148	0.1309	0.1271	0.1241
B16	432.841	0.120657	0.00864165	0.124	0.1256	0.1082	0.1349	0.126	0.1259	0.1108	0.1254	0.1137	0.1239	0.114	0.1127	0.1132	0.1102	0.1169	0.1161	0.1251	0.1287	0.1314	0.1253	0.1246	0.1245	0.1163	0.1155	0.1243	0.1153	0.1158	0.1224	0.1317	0.127	0.1171	0.1359	0.1175	0.1093	0.1177	0.1126	0.1463	0.1209	0.1226	0.1111	0.1179	0.1172	0.1103	0.1278	0.1222	0.1203
B17	435.062	0.117084	0.00892508	0.1207	0.1213	0.1037	0.1316	0.1231	0.1213	0.107	0.1216	0.1106	0.1203	0.1106	0.1093	0.1092	0.1052	0.1132	0.1117	0.1215	0.1248	0.1285	0.1215	0.1215	0.1199	0.1137	0.1111	0.121	0.111	0.1126	0.1189	0.1281	0.1237	0.1126	0.1331	0.1148	0.1055	0.1135	0.1092	0.1434	0.1173	0.1203	0.1068	0.1133	0.1145	0.1071	0.1244	0.118	0.1168
B18	437.283	0.111916	0.00920985	0.117	0.1153	0.0976	0.1268	0.1186	0.1154	0.1015	0.1164	0.1057	0.1155	0.1051	0.1035	0.1035	0.1	0.1078	0.1068	0.1172	0.1177	0.125	0.1163	0.1166	0.1144	0.1082	0.1065	0.1152	0.105	0.1086	0.1135	0.1237	0.1175	0.1082	0.1289	0.1111	0.0996	0.1069	0.1032	0.139	0.1122	0.1152	0.0998	0.1078	0.109	0.1026	0.1191	0.1124	0.1119
B19	439.504	0.107656	0.00943431	0.1131	0.1107	0.0941	0.123	0.1139	0.1125	0.0956	0.1121	0.1018	0.1124	0.1005	0.0997	0.099	0.0958	0.104	0.1024	0.1128	0.1128	0.1214	0.1121	0.1118	0.1099	0.1055	0.1013	0.1104	0.0993	0.1048	0.1091	0.1188	0.1139	0.1031	0.1259	0.1082	0.0955	0.1022	0.0992	0.1346	0.1076	0.1116	0.0942	0.1025	0.1041	0.0991	0.1137	0.1084	0.1088
B20	441.725	0.102691	0.00969243	0.1082	0.1043	0.0886	0.119	0.1076	0.1093	0.0896	0.107	0.0979	0.1081	0.0956	0.0951	0.0938	0.0907	0.1001	0.0964	0.1074	0.108	0.1176	0.1082	0.1063	0.1047	0.1016	0.0962	0.1055	0.0939	0.0995	0.1033	0.1148	0.1083	0.0987	0.1223	0.1033	0.0907	0.0965	0.0943	0.1297	0.1028	0.1061	0.0883	0.0983	0.0984	0.0946	0.1078	0.1035	0.1037
B21	443.946	0.100254	0.00980239	0.1054	0.1021	0.086	0.1172	0.1051	0.1078	0.0871	0.1053	0.0954	0.1055	0.0931	0.0926	0.0908	0.0884	0.0978	0.0926	0.105	0.1056	0.1156	0.1066	0.1039	0.1016	0.0998	0.0942	0.102	0.0912	0.0972	0.1011	0.1132	0.1069	0.0972	0.1193	0.0999	0.0889	0.0941	0.0914	0.1264	0.1001	0.1039	0.0859	0.0971	0.0946	0.0923	0.1049	0.1016	0.1008
B22	446.167	0.0974786	0.010004	0.1023	0.0993	0.0828	0.1148	0.102	0.1058	0.0843	0.1047	0.0916	0.1031	0.09	0.0894	0.0885	0.0855	0.0955	0.0892	0.1024	0.1031	0.1131	0.1035	0.1012	0.0999	0.0971	0.0914	0.0984	0.0885	0.0937	0.0977	0.1117	0.1049	0.0952	0.1173	0.097	0.0851	0.0908	0.0891	0.1243	0.0978	0.0999	0.0833	0.0934	0.0916	0.0903	0.1028	0.0987	0.0986
B23	448.389	0.0953686	0.0101736	0.1	0.0977	0.0808	0.1131	0.1002	0.1035	0.0827	0.1028	0.0892	0.1015	0.0876	0.087	0.0867	0.0833	0.0937	0.0871	0.1001	0.1024	0.1109	0.1005	0.0988	0.0976	0.0959	0.09	0.0956	0.0858	0.0913	0.0955	0.1094	0.1028	0.0929	0.1166	0.0939	0.082	0.0895	0.0869	0.1223	0.0961	0.0978	0.0812	0.0913	0.0897	0.0878	0.1008	0.097	0.0971
B24	450.61	0.0931529	0.0102981	0.0982	0.0961	0.0793	0.1116	0.0984	0.1018	0.0803	0.1008	0.0869	0.0998	0.0855	0.0844	0.084	0.0796	0.092	0.085	0.0975	0.1009	0.1087	0.0972	0.0972	0.0961	0.0938	0.0885	0.0927	0.084	0.0876	0.0932	0.1069	0.1009	0.0899	0.1122	0.0918	0.0788	0.0871	0.0851	0.1211	0.0941	0.0952	0.0799	0.089	0.0874	0.085	0.0988	0.095	0.0956
B25	452.831	0.0922386	0.0104531	0.0973	0.096	0.0781	0.1101	0.0976	0.1012	0.0794	0.0996	0.0845	0.099	0.0859	0.0834	0.0842	0.0781	0.0916	0.0839	0.0972	0.1004	0.107	0.0967	0.0962	0.096	0.0918	0.0873	0.0927	0.0817	0.0863	0.092	0.1064	0.1012	0.0889	0.1101	0.0896	0.078	0.0863	0.0842	0.1214	0.0934	0.0951	0.0798	0.0878	0.0859	0.0825	0.0986	0.0929	0.0945
B26	455.052	0.0905629	0.010648	0.096	0.0942	0.0772	0.1085	0.0967	0.0996	0.078	0.0982	0.0824	0.0978	0.0845	0.081	0.0825	0.0765	0.09	0.0821	0.0956	0.0983	0.1059	0.0956	0.0946	0.0946	0.0903	0.0859	0.0905	0.0792	0.0837	0.0902	0.1054	0.1001	0.0864	0.1079	0.0879	0.0764	0.0851	0.0826	0.1203	0.0918	0.0935	0.078	0.0861	0.0833	0.0799	0.0974	0.091	0.0932
B27	457.273	0.0896586	0.0107814	0.0953	0.0933	0.0759	0.108	0.0964	0.0987	0.0771	0.097	0.0809	0.0969	0.0842	0.0795	0.0814	0.0748	0.0881	0.0809	0.0952	0.0975	0.1048	0.0949	0.094	0.093	0.0897	0.0855	0.0898	0.0785	0.0832	0.0899	0.1043	0.099	0.0849	0.1063	0.0872	0.0752	0.0833	0.0817	0.1203	0.0907	0.0927	0.0772	0.085	0.0824	0.0788	0.0961	0.0902	0.093
B28	459.494	0.0884171	0.0108669	0.0949	0.0914	0.0746	0.1066	0.0952	0.0971	0.075	0.096	0.0797	0.0961	0.0833	0.0786	0.0793	0.0733	0.0866	0.0796	0.0941	0.0961	0.1045	0.0929	0.0927	0.0914	0.0884	0.0847	0.0899	0.0774	0.0823	0.0891	0.1035	0.0976	0.0836	0.1052	0.0862	0.0729	0.0813	0.0809	0.1194	0.0892	0.0913	0.0756	0.0831	0.0809	0.0776	0.094	0.0891	0.0919
B29	461.715	0.0881329	0.0109095	0.0947	0.0906	0.0742	0.1068	0.0947	0.0975	0.0745	0.0955	0.0788	0.0963	0.083	0.0786	0.0779	0.0732	0.0856	0.0795	0.0941	0.0961	0.1044	0.0924	0.0925	0.0901	0.0884	0.0837	0.0901	0.0771	0.0825	0.0888	0.1032	0.0982	0.0833	0.1054	0.0858	0.0726	0.0809	0.0812	0.1188	0.0888	0.091	0.0753	0.083	0.0805	0.0774	0.0934	0.0891	0.092
B30	463.936	0.0870343	0.0110666	0.0942	0.0889	0.0727	0.1068	0.0934	0.0972	0.0729	0.0943	0.0782	0.0949	0.082	0.0773	0.0769	0.0726	0.0835	0.0779	0.0935	0.0952	0.1043	0.0916	0.0916	0.0878	0.0876	0.0821	0.0886	0.076	0.0808	0.0881	0.1029	0.0962	0.0826	0.1061	0.0854	0.0711	0.0804	0.0802	0.1183	0.0881	0.0891	0.0732	0.0814	0.079	0.076	0.0917	0.0885	0.0907
B31	466.157	0.0865914	0.011156	0.0942	0.0883	0.0726	0.1067	0.0933	0.0967	0.0717	0.0939	0.0777	0.0935	0.0821	0.077	0.076	0.072	0.0825	0.0775	0.0937	0.095	0.1047	0.0912	0.0905	0.0866	0.0867	0.0813	0.0885	0.076	0.0807	0.0878	0.1021	0.096	0.0822	0.1068	0.0846	0.0706	0.0796	0.0785	0.1178	0.0871	0.0884	0.0724	0.0817	0.0785	0.0759	0.0909	0.0885	0.091
B32	468.378	0.0856671	0.0112859	0.0934	0.0866	0.0714	0.106	0.0922	0.0959	0.0704	0.0927	0.0775	0.0924	0.0807	0.0764	0.075	0.0717	0.081	0.0763	0.0933	0.0942	0.1038	0.0903	0.0907	0.0855	0.0862	0.0806	0.0875	0.0753	0.0796	0.0872	0.1021	0.0942	0.0815	0.1075	0.0833	0.0693	0.0784	0.0777	0.1177	0.086	0.0873	0.0714	0.0797	0.0783	0.0747	0.0903	0.0871	0.09
B33	470.599	0.0853371	0.0115138	0.094	0.0858	0.0702	0.106	0.0919	0.0956	0.0706	0.0921	0.0769	0.0921	0.0798	0.0762	0.0746	0.0719	0.0804	0.0759	0.0932	0.0951	0.1031	0.0892	0.0907	0.0849	0.0869	0.0797	0.0872	0.0747	0.0793	0.0869	0.102	0.0934	0.0808	0.11	0.0821	0.069	0.078	0.0772	0.1181	0.086	0.0872	0.0709	0.0797	0.0784	0.0742	0.0902	0.0869	0.0897
B34	472.82	0.0842686	0.0116776	0.0939	0.0843	0.0688	0.1041	0.0911	0.0952	0.0696	0.0915	0.0755	0.0914	0.0787	0.0746	0.0737	0.0706	0.0795	0.0744	0.0932	0.0942	0.1016	0.0882	0.0892	0.0846	0.086	0.0783	0.086	0.0738	0.0777	0.0857	0.1016	0.093	0.0797	0.1075	0.0807	0.0679	0.0767	0.0761	0.1172	0.0849	0.0857	0.07	0.0786	0.077	0.0725	0.0894	0.085	0.0884
B35	475.041	0.0838114	0.011876	0.0936	0.0838	0.0684	0.1027	0.0903	0.0953	0.0694	0.0916	0.0745	0.0918	0.0792	0.0744	0.0739	0.0699	0.079	0.0737	0.0923	0.0938	0.0997	0.0887	0.088	0.084	0.085	0.0776	0.0859	0.0724	0.0775	0.0855	0.1014	0.0933	0.0794	0.1079	0.0795	0.0678	0.0762	0.0751	0.1183	0.0849	0.086	0.069	0.078	0.0766	0.071	0.0889	0.0829	0.0882
B36	477.263	0.0829471	0.0120429	0.0924	0.0823	0.0676	0.1017	0.0902	0.0942	0.0685	0.0911	0.0739	0.0918	0.0781	0.0737	0.0733	0.0687	0.0783	0.0728	0.0919	0.0929	0.099	0.0881	0.0867	0.0825	0.0841	0.0776	0.085	0.0718	0.0765	0.0835	0.1018	0.0932	0.0788	0.1069	0.0785	0.0666	0.0751	0.0745	0.1174	0.0845	0.0851	0.0673	0.0773	0.0753	0.0699	0.0883	0.0817	0.0872
B37	479.484	0.0831429	0.0121391	0.0925	0.0826	0.0672	0.1018	0.0903	0.0943	0.0687	0.0913	0.074	0.092	0.0786	0.0738	0.0733	0.0681	0.0784	0.0725	0.0924	0.0938	0.0996	0.0891	0.0865	0.0826	0.0845	0.0787	0.0854	0.0716	0.0771	0.0832	0.1025	0.0935	0.0789	0.1062	0.0782	0.0661	0.0747	0.0746	0.1187	0.0849	0.0851	0.0671	0.077	0.0757	0.0696	0.0883	0.0823	0.0876
B38	481.705	0.08284	0.0122597	0.0928	0.0827	0.0671	0.1012	0.0905	0.0939	0.0681	0.0909	0.0737	0.0921	0.0782	0.0735	0.072	0.0671	0.0781	0.0719	0.092	0.0942	0.1002	0.0896	0.0854	0.0818	0.0841	0.0789	0.0855	0.0709	0.0764	0.0827	0.1029	0.093	0.0789	0.1067	0.0776	0.0648	0.075	0.0747	0.1185	0.0846	0.0845	0.0664	0.0762	0.0753	0.0695	0.0879	0.0826	0.0875
B39	483.926	0.0832929	0.0122893	0.0929	0.0837	0.0673	0.1022	0.0914	0.0947	0.0684	0.0908	0.074	0.0922	0.0782	0.0734	0.0722	0.0677	0.0788	0.0729	0.0931	0.0944	0.1015	0.0911	0.0852	0.082	0.0843	0.0792	0.0856	0.0713	0.0769	0.0826	0.1034	0.0929	0.0793	0.1079	0.0786	0.0651	0.0758	0.0758	0.1183	0.0855	0.0845	0.067	0.0765	0.0753	0.0694	0.0878	0.0833	0.0885
B40	486.147	0.0833743	0.0124392	0.0934	0.0837	0.0666	0.1028	0.0919	0.0957	0.0673	0.0901	0.0737	0.0916	0.0783	0.0731	0.0721	0.0673	0.0789	0.0726	0.0933	0.0946	0.1025	0.0919	0.0849	0.0824	0.0849	0.0791	0.0853	0.0711	0.0766	0.0831	0.1044	0.092	0.0791	0.1086	0.0791	0.0648	0.0761	0.0758	0.1183	0.0861	0.0835	0.0671	0.0759	0.0747	0.0695	0.0875	0.0836	0.0889
B41	488.368	0.0838543	0.0124992	0.0943	0.0842	0.067	0.1042	0.0923	0.0965	0.067	0.0903	0.0743	0.0912	0.0792	0.0736	0.072	0.0671	0.0801	0.0733	0.0944	0.0952	0.1038	0.0928	0.0851	0.0835	0.0849	0.079	0.0858	0.0715	0.0772	0.0841	0.1043	0.0925	0.0797	0.1098	0.0797	0.0657	0.0759	0.0761	0.1187	0.086	0.0832	0.0675	0.0765	0.0749	0.0705	0.0875	0.0839	0.0899
B42	490.589	0.0838957	0.0126141	0.0949	0.0848	0.0666	0.1048	0.0922	0.0973	0.0669	0.0899	0.0745	0.091	0.0791	0.0739	0.0717	0.0673	0.0799	0.073	0.0943	0.0951	0.1041	0.0932	0.0866	0.0837	0.0851	0.0783	0.0862	0.0714	0.0766	0.0848	0.105	0.0923	0.0792	0.1101	0.0789	0.0657	0.0769	0.0763	0.1186	0.0852	0.0832	0.0678	0.076	0.0748	0.0704	0.0875	0.0838	0.0896
B43	492.81	0.0842914	0.0127704	0.0972	0.085	0.0666	0.1064	0.0928	0.0979	0.0674	0.0906	0.0742	0.0911	0.0794	0.0737	0.0726	0.0675	0.0798	0.0739	0.0949	0.0959	0.1041	0.0926	0.0879	0.0841	0.0863	0.0773	0.0864	0.0719	0.0765	0.0853	0.1058	0.0928	0.0792	0.1114	0.079	0.0661	0.0774	0.0765	0.1193	0.0854	0.0838	0.0683	0.0761	0.0751	0.0707	0.0878	0.0842	0.0895
B44	495.031	0.0840914	0.0130529	0.098	0.0849	0.0664	0.1066	0.093	0.0973	0.0667	0.0904	0.074	0.0905	0.0789	0.0737	0.0728	0.0672	0.0796	0.0738	0.0957	0.0958	0.1029	0.0925	0.0874	0.0843	0.0859	0.0764	0.0867	0.0712	0.0768	0.0852	0.1056	0.0929	0.079	0.1125	0.0784	0.0657	0.0779	0.0758	0.1193	0.0845	0.0836	0.0682	0.0757	0.0736	0.0703	0.0879	0.0838	0.0885
B45	497.252	0.0845329	0.0132277	0.098	0.0855	0.0675	0.1072	0.0933	0.0975	0.0668	0.0918	0.0745	0.0913	0.0796	0.0743	0.0734	0.0676	0.08	0.0745	0.0953	0.0962	0.1026	0.0933	0.0883	0.0848	0.0862	0.0771	0.0872	0.0715	0.0772	0.0857	0.1054	0.094	0.0797	0.1138	0.0787	0.066	0.078	0.0759	0.1212	0.085	0.0845	0.0681	0.0758	0.0739	0.0701	0.0884	0.0839	0.089
B46	499.473	0.0843886	0.0133906	0.0973	0.0849	0.0676	0.1067	0.0936	0.0972	0.0664	0.0923	0.0744	0.0912	0.0787	0.074	0.073	0.0674	0.0793	0.0746	0.0957	0.0963	0.1021	0.0939	0.0882	0.0849	0.0862	0.0775	0.087	0.0713	0.0771	0.0852	0.1065	0.094	0.0804	0.1135	0.0781	0.065	0.0774	0.0758	0.1211	0.0847	0.0844	0.0678	0.0762	0.0735	0.07	0.0889	0.0842	0.0889
B47	501.694	0.08521	0.0135533	0.098	0.0861	0.0686	0.1066	0.0947	0.098	0.0674	0.0937	0.075	0.0922	0.079	0.0748	0.0736	0.0681	0.08	0.0747	0.0968	0.0977	0.1034	0.0958	0.0888	0.085	0.0876	0.0789	0.0873	0.0712	0.0781	0.0862	0.1072	0.0952	0.0811	0.1141	0.0788	0.0655	0.0776	0.0757	0.1231	0.0854	0.0849	0.0684	0.0768	0.0746	0.0703	0.0891	0.0853	0.0897
B48	503.916	0.0854771	0.0137477	0.0986	0.0866	0.0695	0.1063	0.0955	0.0992	0.0675	0.0942	0.0752	0.0934	0.0786	0.0749	0.0735	0.068	0.08	0.0745	0.0963	0.0982	0.1043	0.0962	0.0885	0.0849	0.0875	0.0793	0.0874	0.0713	0.0778	0.0866	0.1082	0.095	0.0815	0.1146	0.0787	0.0658	0.0783	0.0762	0.1241	0.0858	0.0854	0.0686	0.0772	0.0746	0.0703	0.089	0.0851	0.0905
B49	506.137	0.0865371	0.0138025	0.0989	0.0873	0.0703	0.1073	0.0969	0.1014	0.0685	0.0951	0.0766	0.0948	0.0795	0.0758	0.0749	0.069	0.0813	0.0752	0.0971	0.0991	0.1054	0.0977	0.09	0.0864	0.0885	0.0799	0.0878	0.0727	0.0788	0.0879	0.1095	0.0956	0.0821	0.1152	0.0804	0.0667	0.0786	0.0774	0.1256	0.0874	0.0864	0.0698	0.0781	0.0759	0.071	0.0897	0.0859	0.0919
B50	508.358	0.0871971	0.0139698	0.0997	0.088	0.0703	0.1081	0.0983	0.1033	0.0687	0.0956	0.0763	0.0959	0.0808	0.0766	0.0752	0.0687	0.0822	0.0751	0.0975	0.0995	0.1064	0.0987	0.091	0.0876	0.0893	0.0806	0.0887	0.0728	0.08	0.089	0.1112	0.0957	0.0829	0.1156	0.0809	0.0671	0.079	0.0784	0.1264	0.0881	0.0862	0.0701	0.078	0.076	0.0717	0.0908	0.0856	0.0925
B51	510.579	0.0887486	0.0140086	0.1017	0.0895	0.072	0.1107	0.1005	0.1054	0.0701	0.0975	0.0774	0.0988	0.083	0.0781	0.0766	0.0703	0.0833	0.0766	0.0994	0.1007	0.1087	0.1001	0.093	0.0894	0.0908	0.0821	0.0903	0.074	0.0821	0.0908	0.1129	0.0971	0.0841	0.1174	0.083	0.0682	0.0809	0.0803	0.1279	0.09	0.0873	0.0715	0.0794	0.0774	0.0735	0.0918	0.0872	0.094
B52	512.8	0.0901729	0.0141021	0.1035	0.091	0.0724	0.1121	0.1025	0.1072	0.0716	0.0985	0.079	0.1006	0.0856	0.0797	0.0778	0.0713	0.0838	0.0775	0.1003	0.1019	0.1106	0.1015	0.0954	0.0905	0.0917	0.0832	0.0915	0.0761	0.0826	0.0927	0.1154	0.0978	0.085	0.118	0.0847	0.0693	0.0834	0.0822	0.1293	0.0915	0.0894	0.0729	0.0811	0.0786	0.075	0.0933	0.0884	0.0952
B53	515.021	0.0924057	0.0142146	0.1062	0.093	0.0745	0.1149	0.105	0.1088	0.0734	0.1006	0.0803	0.1031	0.088	0.081	0.0802	0.0728	0.0859	0.0807	0.1028	0.1042	0.1133	0.1031	0.0986	0.0926	0.0938	0.0856	0.0934	0.0784	0.0848	0.0948	0.1181	0.1001	0.0877	0.1204	0.0878	0.0713	0.0864	0.0838	0.1313	0.0942	0.0919	0.075	0.0837	0.0809	0.0772	0.0954	0.0899	0.097
B54	517.242	0.0943543	0.0143292	0.1078	0.0953	0.0759	0.1163	0.1078	0.1098	0.0754	0.101	0.0817	0.1037	0.0894	0.0832	0.0825	0.0745	0.0879	0.0831	0.1048	0.1067	0.1155	0.1049	0.1009	0.0956	0.0946	0.0875	0.095	0.0806	0.0871	0.0964	0.1209	0.1015	0.0898	0.1232	0.0903	0.073	0.0888	0.0858	0.1342	0.0965	0.0943	0.0765	0.0867	0.0826	0.0793	0.0981	0.0922	0.0989
B55	519.463	0.09705	0.0143652	0.1094	0.0982	0.0785	0.1184	0.1103	0.113	0.0779	0.1035	0.0839	0.1055	0.0912	0.0851	0.0851	0.0771	0.0909	0.0863	0.1067	0.1094	0.1189	0.108	0.1047	0.0983	0.0974	0.0905	0.0969	0.083	0.089	0.0987	0.1236	0.1049	0.0926	0.1259	0.093	0.0752	0.0918	0.0888	0.1365	0.1003	0.0969	0.0795	0.0909	0.0864	0.082	0.1006	0.0954	0.1015
B56	521.684	0.0990443	0.014521	0.112	0.1002	0.08	0.1201	0.1119	0.1148	0.0803	0.1052	0.0859	0.1069	0.0922	0.0872	0.0871	0.0791	0.093	0.0884	0.1094	0.1117	0.1221	0.1099	0.1067	0.1	0.0992	0.0922	0.0983	0.0845	0.0902	0.1	0.1262	0.1071	0.0949	0.1284	0.0941	0.0761	0.0942	0.091	0.1389	0.1026	0.0987	0.0813	0.0942	0.089	0.0841	0.1028	0.0978	0.1033
B57	523.905	0.101429	0.0144545	0.1142	0.1033	0.0819	0.1215	0.1142	0.1169	0.0828	0.1073	0.0876	0.1089	0.0948	0.0901	0.0895	0.0821	0.0964	0.09	0.1127	0.1145	0.1255	0.1108	0.109	0.101	0.1021	0.0947	0.1009	0.0866	0.0925	0.1023	0.127	0.1098	0.097	0.131	0.0968	0.0787	0.0967	0.0933	0.1406	0.1059	0.1006	0.0833	0.0977	0.0919	0.0862	0.1051	0.1004	0.1059
B58	526.126	0.103024	0.0143781	0.1158	0.1054	0.0832	0.1237	0.1152	0.1192	0.0844	0.1074	0.0899	0.1104	0.0964	0.0923	0.0908	0.0835	0.0985	0.0917	0.1139	0.1163	0.1274	0.1106	0.1111	0.1024	0.103	0.0961	0.1021	0.0885	0.0932	0.1034	0.1287	0.1121	0.0987	0.132	0.0986	0.0801	0.0987	0.0956	0.1422	0.108	0.1014	0.0846	0.1009	0.0935	0.088	0.1079	0.1021	0.1082
B59	528.347	0.104864	0.0143566	0.1175	0.1066	0.0848	0.1246	0.117	0.1217	0.0863	0.1095	0.0921	0.1119	0.0993	0.0946	0.0926	0.0848	0.1005	0.0934	0.1158	0.1182	0.1291	0.1116	0.1132	0.1043	0.1039	0.0975	0.1042	0.0909	0.095	0.1058	0.1299	0.1142	0.1007	0.1331	0.1011	0.0812	0.1003	0.0978	0.1443	0.1099	0.1027	0.0858	0.1025	0.0954	0.0896	0.1107	0.1047	0.1107
B60	530.568	0.106149	0.0143421	0.1186	0.1074	0.0858	0.1255	0.1189	0.1234	0.0873	0.1104	0.0934	0.1135	0.1016	0.0967	0.0939	0.0864	0.1019	0.0942	0.1173	0.1196	0.1314	0.1126	0.1145	0.1051	0.1052	0.0988	0.1062	0.0931	0.0964	0.1068	0.1317	0.1148	0.1028	0.1336	0.1026	0.082	0.1025	0.0995	0.1446	0.1109	0.103	0.0863	0.1034	0.0963	0.0906	0.1131	0.106	0.1119
B61	532.79	0.108077	0.0143559	0.1208	0.1087	0.0879	0.1276	0.1212	0.1257	0.0889	0.1122	0.0955	0.116	0.1041	0.0991	0.0953	0.0883	0.1037	0.0954	0.1195	0.1218	0.134	0.1144	0.1172	0.1071	0.1074	0.1006	0.1082	0.0961	0.0993	0.1084	0.1337	0.1163	0.1043	0.1342	0.1049	0.0839	0.1053	0.1021	0.1462	0.1134	0.105	0.0881	0.1054	0.0981	0.0924	0.1146	0.1081	0.1146
B62	535.011	0.109473	0.0145254	0.1224	0.1095	0.0887	0.1283	0.1235	0.1274	0.09	0.114	0.0972	0.1173	0.1064	0.1007	0.0966	0.089	0.104	0.0967	0.1202	0.1234	0.1351	0.1163	0.12	0.108	0.1087	0.101	0.1097	0.0984	0.1	0.1108	0.1364	0.1173	0.1059	0.1339	0.1067	0.0858	0.1069	0.1038	0.1473	0.1146	0.1069	0.0888	0.1071	0.0989	0.0931	0.1166	0.1099	0.1167
B63	537.232	0.11114	0.0147373	0.1241	0.1104	0.0909	0.1297	0.126	0.1293	0.0911	0.1163	0.0985	0.1185	0.1074	0.1025	0.098	0.0892	0.1054	0.0983	0.1213	0.1253	0.1369	0.1189	0.1221	0.1095	0.1106	0.1028	0.1124	0.0999	0.1026	0.1132	0.1383	0.1194	0.1078	0.1343	0.1087	0.0878	0.1083	0.1048	0.1489	0.1157	0.1087	0.0899	0.1088	0.1005	0.0937	0.1179	0.1113	0.1198
B64	539.453	0.112081	0.0149136	0.1255	0.1114	0.0922	0.1307	0.1278	0.1299	0.0925	0.1167	0.0986	0.1181	0.1076	0.1032	0.0989	0.0891	0.1059	0.0983	0.1214	0.127	0.1377	0.1201	0.1241	0.1109	0.1119	0.1043	0.1128	0.1011	0.1042	0.114	0.1405	0.1201	0.1087	0.1361	0.1097	0.0887	0.1081	0.1057	0.1511	0.1175	0.1102	0.0902	0.1105	0.1012	0.0952	0.1186	0.1126	0.1212
B65	541.674	0.113546	0.0152269	0.1265	0.1132	0.0935	0.1329	0.1299	0.132	0.0928	0.1194	0.1002	0.1194	0.1079	0.1044	0.1006	0.0892	0.1075	0.0995	0.1225	0.1286	0.1398	0.1221	0.1259	0.1119	0.1147	0.106	0.1149	0.1023	0.1057	0.1152	0.1433	0.1219	0.1092	0.1385	0.1102	0.089	0.1092	0.1062	0.1527	0.1187	0.1117	0.0921	0.1125	0.1033	0.0957	0.1189	0.1147	0.1228
B66	543.895	0.114211	0.0155751	0.129	0.1147	0.0943	0.1347	0.1309	0.1317	0.0934	0.1208	0.1009	0.1204	0.1085	0.1055	0.1016	0.0892	0.108	0.0999	0.124	0.1295	0.1411	0.123	0.1256	0.113	0.1155	0.1069	0.1161	0.1018	0.1059	0.1154	0.1449	0.1223	0.1092	0.1412	0.1102	0.0889	0.1095	0.1064	0.1547	0.1189	0.1124	0.0922	0.1126	0.1031	0.0965	0.12	0.1157	0.1234
B67	546.116	0.115147	0.0156725	0.1295	0.1162	0.095	0.1359	0.1326	0.133	0.094	0.1222	0.1015	0.1211	0.1096	0.1066	0.1029	0.0903	0.1098	0.1008	0.1253	0.131	0.1421	0.1241	0.1259	0.1136	0.1173	0.1082	0.1173	0.1019	0.107	0.117	0.1455	0.1233	0.1094	0.1438	0.1121	0.0898	0.1095	0.1076	0.1556	0.1213	0.113	0.0926	0.114	0.1028	0.0985	0.1207	0.1169	0.1238
B68	548.337	0.115616	0.0158494	0.1299	0.1172	0.0949	0.1377	0.1326	0.1338	0.0938	0.1221	0.1024	0.1217	0.11	0.1076	0.1036	0.0904	0.1107	0.1012	0.1259	0.1317	0.1422	0.1249	0.1261	0.1148	0.1175	0.1092	0.1178	0.1022	0.1063	0.1166	0.1465	0.1244	0.1103	0.146	0.1129	0.0898	0.1092	0.1082	0.1575	0.1219	0.1124	0.0928	0.115	0.1024	0.0995	0.1216	0.1171	0.1244
B69	550.558	0.11643	0.0161931	0.1304	0.1185	0.0954	0.1393	0.1328	0.1359	0.0945	0.1235	0.1021	0.1228	0.1115	0.1082	0.1044	0.0905	0.1116	0.1021	0.1274	0.1321	0.1431	0.1258	0.1261	0.1162	0.1181	0.1101	0.118	0.1031	0.107	0.117	0.1474	0.1247	0.1109	0.1481	0.1133	0.0901	0.1102	0.1088	0.1598	0.1224	0.1129	0.0932	0.115	0.1022	0.1006	0.1228	0.1185	0.1252
B70	552.779	0.116981	0.0162964	0.1303	0.1198	0.0954	0.1413	0.1327	0.137	0.0952	0.1228	0.1026	0.1241	0.1112	0.1082	0.1053	0.0917	0.1131	0.1027	0.1283	0.1334	0.1444	0.1269	0.1266	0.1167	0.1187	0.1112	0.1176	0.1036	0.1073	0.1168	0.1482	0.1246	0.1127	0.1483	0.1141	0.0901	0.1117	0.1091	0.161	0.1225	0.1127	0.0938	0.1153	0.1027	0.1009	0.1237	0.1191	0.1249
B71	555	0.117956	0.016655	0.1322	0.1223	0.0961	0.1435	0.1334	0.1385	0.0958	0.1237	0.1032	0.1258	0.1111	0.1079	0.1054	0.0925	0.1142	0.1033	0.1297	0.1351	0.1455	0.1285	0.1287	0.1187	0.1192	0.1112	0.1183	0.1034	0.1085	0.1167	0.1491	0.1256	0.1142	0.1484	0.1152	0.0912	0.1131	0.1098	0.1633	0.1237	0.1142	0.0946	0.1155	0.1036	0.1014	0.125	0.1195	0.1253
B72	557.221	0.118493	0.0169212	0.1327	0.1222	0.096	0.1438	0.1328	0.1402	0.0962	0.1247	0.1036	0.1278	0.1111	0.1078	0.1055	0.0931	0.114	0.1044	0.1315	0.1352	0.1458	0.1295	0.1302	0.1191	0.1194	0.1109	0.1177	0.1027	0.1083	0.1174	0.1503	0.1261	0.1149	0.1486	0.1159	0.0918	0.1135	0.11	0.1641	0.124	0.1144	0.0949	0.1161	0.1041	0.1011	0.1265	0.1197	0.1253
B73	559.443	0.119216	0.0171794	0.1338	0.1236	0.0969	0.1448	0.1336	0.1418	0.0968	0.126	0.1045	0.1286	0.1105	0.1081	0.105	0.0934	0.1148	0.1049	0.1321	0.1358	0.1465	0.1304	0.1315	0.1195	0.1202	0.1112	0.1185	0.1026	0.1095	0.1184	0.1511	0.1277	0.1158	0.1482	0.1156	0.0919	0.1134	0.11	0.1654	0.1246	0.115	0.0949	0.1168	0.1054	0.1013	0.1271	0.1198	0.1267
B74	561.664	0.118984	0.0174607	0.1338	0.1244	0.0967	0.1445	0.1339	0.1416	0.0959	0.1258	0.1038	0.1296	0.1096	0.1067	0.1044	0.0929	0.1142	0.1036	0.1322	0.135	0.1468	0.1301	0.1315	0.1186	0.1203	0.1114	0.117	0.102	0.1099	0.1181	0.1512	0.1279	0.1155	0.1486	0.1141	0.0909	0.1136	0.1092	0.1666	0.126	0.1146	0.0942	0.116	0.1055	0.1015	0.1264	0.1188	0.126
B75	563.885	0.118861	0.0177832	0.1338	0.1238	0.0959	0.1446	0.134	0.1415	0.0948	0.1274	0.1041	0.1305	0.1095	0.1064	0.1035	0.0922	0.1138	0.1034	0.1328	0.1349	0.1472	0.1304	0.1304	0.1186	0.1201	0.1106	0.1168	0.102	0.1096	0.118	0.1521	0.1284	0.114	0.1485	0.113	0.0901	0.1136	0.108	0.1669	0.1256	0.1149	0.0935	0.1152	0.1059	0.1002	0.1257	0.119	0.1264
B76	566.106	0.117921	0.0182475	0.1344	0.1233	0.0948	0.1441	0.1336	0.1406	0.094	0.1275	0.1029	0.1301	0.108	0.1048	0.1017	0.0904	0.112	0.1022	0.1317	0.1344	0.147	0.1298	0.1285	0.1185	0.1184	0.1095	0.1156	0.1003	0.1081	0.1168	0.1518	0.1278	0.1132	0.1487	0.1114	0.0889	0.1122	0.1074	0.1671	0.125	0.1141	0.0918	0.1134	0.1041	0.0991	0.1251	0.1183	0.1261
B77	568.327	0.117101	0.0185768	0.1336	0.1214	0.0934	0.143	0.1331	0.1404	0.0925	0.128	0.102	0.1294	0.1073	0.1042	0.1007	0.0896	0.1108	0.1017	0.1314	0.1332	0.1464	0.1295	0.1264	0.1178	0.1178	0.1074	0.1153	0.0998	0.1066	0.1164	0.152	0.1285	0.1121	0.15	0.1101	0.0885	0.1107	0.1069	0.1675	0.1248	0.1139	0.0905	0.1122	0.1025	0.0979	0.1229	0.1176	0.1253
B78	570.548	0.115559	0.018942	0.1324	0.1194	0.0909	0.1425	0.1313	0.1392	0.0902	0.1273	0.0998	0.1273	0.106	0.1031	0.0994	0.0877	0.109	0.1001	0.1306	0.1309	0.145	0.1288	0.1238	0.1166	0.1162	0.1057	0.1148	0.0989	0.1039	0.1144	0.1514	0.1281	0.1103	0.1498	0.1072	0.0867	0.1088	0.1057	0.1677	0.1223	0.1124	0.0889	0.1099	0.1002	0.0962	0.1211	0.1168	0.1246
B79	572.769	0.11462	0.0193689	0.1315	0.1179	0.0893	0.1435	0.1308	0.1394	0.089	0.1267	0.0973	0.1269	0.1055	0.1013	0.0983	0.0862	0.1078	0.0991	0.1298	0.1289	0.144	0.1284	0.1221	0.1153	0.1152	0.1042	0.1136	0.0974	0.1026	0.114	0.1509	0.1285	0.1093	0.1502	0.1061	0.0855	0.1084	0.1046	0.1679	0.1203	0.1118	0.0876	0.1084	0.0982	0.0948	0.1199	0.1172	0.1238
B80	574.99	0.113497	0.0197024	0.1304	0.1165	0.0879	0.1436	0.1297	0.1386	0.0875	0.1254	0.0953	0.1261	0.1036	0.0992	0.097	0.0851	0.1062	0.0984	0.1294	0.128	0.1424	0.1274	0.1205	0.1144	0.1141	0.1037	0.1136	0.0952	0.101	0.1133	0.1506	0.128	0.1095	0.1495	0.1058	0.0832	0.1073	0.1033	0.1679	0.1183	0.1115	0.086	0.107	0.0969	0.0929	0.1187	0.1168	0.1224
B81	577.211	0.11283	0.0201112	0.1309	0.1161	0.0873	0.1438	0.1295	0.1386	0.0864	0.125	0.0936	0.1258	0.1028	0.0973	0.0958	0.0845	0.1056	0.0975	0.1294	0.1277	0.1418	0.1265	0.1207	0.1138	0.1132	0.1022	0.1146	0.0932	0.1003	0.1117	0.1495	0.1281	0.109	0.15	0.1047	0.0821	0.106	0.1019	0.1673	0.1168	0.1121	0.0849	0.1054	0.096	0.0916	0.1184	0.1158	0.1213
B82	579.432	0.111983	0.0203678	0.131	0.1141	0.0869	0.1422	0.1268	0.1383	0.0859	0.1247	0.092	0.1262	0.1019	0.0957	0.0956	0.0838	0.1048	0.0969	0.1301	0.1273	0.1414	0.1255	0.1207	0.1125	0.1116	0.1013	0.1136	0.0913	0.0999	0.1107	0.1488	0.1271	0.1078	0.1507	0.1031	0.0804	0.1045	0.1005	0.1669	0.1154	0.1114	0.0839	0.1045	0.095	0.0904	0.118	0.1145	0.1201
B83	581.653	0.111996	0.0205695	0.1321	0.1148	0.0874	0.1429	0.1279	0.1386	0.0855	0.1254	0.092	0.1262	0.1013	0.0947	0.0957	0.0838	0.1049	0.0972	0.1299	0.128	0.1406	0.1255	0.1213	0.1115	0.1118	0.1007	0.1144	0.0902	0.1004	0.1115	0.1486	0.1276	0.108	0.151	0.1019	0.08	0.1036	0.0996	0.1671	0.1151	0.1121	0.0833	0.1038	0.095	0.09	0.1178	0.1151	0.1198
B84	583.874	0.111529	0.0208063	0.1322	0.1144	0.0874	0.1432	0.1272	0.1384	0.0848	0.1248	0.0915	0.1257	0.1007	0.0933	0.0951	0.0831	0.1044	0.0954	0.1303	0.1281	0.1403	0.1255	0.1203	0.1105	0.1113	0.1004	0.1136	0.089	0.0997	0.1114	0.1473	0.1264	0.1077	0.1515	0.101	0.0789	0.1031	0.0991	0.1671	0.1152	0.112	0.0831	0.1026	0.0948	0.0889	0.1172	0.115	0.1185
B85	586.095	0.111644	0.0209927	0.1332	0.1135	0.0874	0.1443	0.1262	0.1376	0.0852	0.1259	0.0917	0.1253	0.1016	0.093	0.0951	0.0831	0.1042	0.0949	0.1316	0.1288	0.1408	0.1261	0.1204	0.1105	0.1118	0.101	0.113	0.089	0.0997	0.1112	0.147	0.1259	0.1075	0.1525	0.1015	0.0791	0.1024	0.0982	0.1673	0.1154	0.1122	0.0826	0.1019	0.0951	0.0887	0.1171	0.1158	0.1189
B86	588.317	0.111256	0.0212302	0.1328	0.1144	0.087	0.1443	0.1257	0.1377	0.0849	0.1261	0.0914	0.1252	0.1008	0.0926	0.0945	0.0823	0.1036	0.094	0.1309	0.1288	0.1408	0.1261	0.1196	0.11	0.1118	0.1011	0.1126	0.0887	0.0994	0.1104	0.1464	0.1251	0.1078	0.1525	0.1011	0.0787	0.1013	0.0973	0.1675	0.115	0.1112	0.0817	0.1006	0.0946	0.0881	0.1163	0.1161	0.1187
B87	590.538	0.111134	0.0214254	0.1335	0.1147	0.0861	0.1453	0.1255	0.1373	0.0839	0.1265	0.0916	0.1249	0.1013	0.0932	0.094	0.0827	0.1036	0.0934	0.1318	0.1285	0.141	0.1262	0.1182	0.1096	0.1119	0.1001	0.1125	0.0892	0.0989	0.1101	0.1461	0.1258	0.1075	0.1533	0.101	0.0789	0.1	0.0972	0.1683	0.1147	0.111	0.0816	0.0997	0.094	0.0878	0.1157	0.1164	0.1176
B88	592.759	0.110403	0.0215669	0.1328	0.1141	0.0845	0.1459	0.1259	0.1368	0.0827	0.1261	0.0913	0.1243	0.1007	0.0932	0.0932	0.0815	0.1028	0.0929	0.1313	0.1276	0.1404	0.1258	0.1159	0.1094	0.1108	0.0996	0.1114	0.0889	0.0974	0.1104	0.1459	0.1247	0.1064	0.1513	0.0999	0.0778	0.0988	0.0966	0.1688	0.1135	0.1089	0.0812	0.0983	0.0927	0.0868	0.1152	0.1161	0.1168
B89	594.98	0.110353	0.0217808	0.1326	0.1145	0.0842	0.1462	0.1264	0.137	0.0818	0.1257	0.0908	0.1254	0.1008	0.0932	0.0932	0.0808	0.1019	0.092	0.1313	0.1271	0.1412	0.1256	0.1145	0.1088	0.1114	0.0985	0.1113	0.089	0.0971	0.1105	0.1462	0.1249	0.1065	0.1515	0.1009	0.0785	0.0991	0.0959	0.1698	0.1134	0.1081	0.0802	0.098	0.0929	0.0866	0.1149	0.1167	0.1171
B90	597.201	0.109723	0.0219258	0.1317	0.1141	0.0834	0.1448	0.126	0.1374	0.0806	0.1248	0.0905	0.1258	0.1003	0.0928	0.0926	0.0794	0.1011	0.0917	0.1309	0.1266	0.1416	0.1252	0.1133	0.1088	0.1108	0.0985	0.1111	0.0884	0.0962	0.1092	0.1469	0.1238	0.1056	0.1504	0.1002	0.0779	0.099	0.0953	0.1701	0.1129	0.1072	0.0791	0.0978	0.0922	0.0865	0.1141	0.1151	0.1165
B91	599.422	0.109467	0.0220917	0.1314	0.1146	0.0831	0.1441	0.1257	0.1375	0.0799	0.124	0.0899	0.1262	0.0999	0.0931	0.0924	0.079	0.1017	0.0913	0.1302	0.1262	0.1423	0.1246	0.113	0.1081	0.1106	0.0976	0.1106	0.0881	0.0958	0.1081	0.1465	0.1232	0.1054	0.1504	0.0983	0.0776	0.0992	0.0953	0.171	0.113	0.1072	0.0788	0.0966	0.0914	0.0865	0.1132	0.1143	0.1171
B92	601.643	0.109113	0.0222674	0.1323	0.1139	0.0826	0.1425	0.125	0.138	0.0791	0.1242	0.0891	0.1258	0.0987	0.0925	0.0928	0.0784	0.1011	0.0905	0.1295	0.1267	0.1427	0.1245	0.1129	0.1082	0.1093	0.0972	0.1099	0.088	0.0953	0.1084	0.1467	0.1227	0.1049	0.1504	0.0977	0.077	0.0989	0.0951	0.1716	0.113	0.1067	0.0788	0.0962	0.0909	0.0861	0.1134	0.1139	0.1173
B93	603.864	0.109447	0.0224364	0.1323	0.1136	0.0833	0.1428	0.1261	0.1395	0.0785	0.1251	0.0893	0.1263	0.0981	0.0924	0.0922	0.0783	0.1009	0.0914	0.1295	0.1272	0.1424	0.1255	0.1135	0.1084	0.1098	0.0971	0.1105	0.0881	0.0954	0.1089	0.1465	0.1237	0.1057	0.1509	0.0982	0.0781	0.099	0.0952	0.1728	0.1139	0.1084	0.0788	0.0971	0.0909	0.087	0.1136	0.115	0.1173
B94	606.085	0.109149	0.02255	0.132	0.1124	0.0833	0.1418	0.1258	0.1401	0.0784	0.1247	0.0889	0.1259	0.097	0.0915	0.0918	0.0779	0.1004	0.0908	0.1293	0.1264	0.1421	0.1262	0.1134	0.1093	0.1098	0.0967	0.1104	0.0873	0.0946	0.1087	0.1458	0.1234	0.1061	0.1511	0.0982	0.077	0.0984	0.0954	0.1725	0.1136	0.1081	0.0791	0.0961	0.091	0.0864	0.1133	0.1153	0.1167
B95	608.306	0.109257	0.0224914	0.1319	0.1121	0.0835	0.1412	0.1253	0.1394	0.0788	0.1256	0.0891	0.1255	0.0975	0.0912	0.0922	0.0783	0.1	0.091	0.1288	0.1255	0.1415	0.1267	0.1138	0.1098	0.1103	0.0972	0.1103	0.0873	0.0949	0.1088	0.1447	0.1236	0.1066	0.1518	0.0991	0.0768	0.0985	0.0947	0.1725	0.1137	0.1085	0.079	0.095	0.0916	0.0871	0.1131	0.1153	0.117
B96	610.527	0.108781	0.0225689	0.1312	0.1117	0.0834	0.1404	0.124	0.1384	0.0791	0.1263	0.0892	0.1257	0.0966	0.0907	0.0913	0.078	0.0996	0.0906	0.1286	0.1246	0.1405	0.1277	0.1139	0.1095	0.1098	0.0965	0.1099	0.0866	0.0941	0.1081	0.1437	0.1234	0.1066	0.1514	0.0991	0.0752	0.097	0.0945	0.1721	0.1137	0.1083	0.0785	0.0933	0.0909	0.0869	0.1127	0.115	0.1157
B97	612.748	0.108503	0.0226539	0.1316	0.1109	0.0832	0.1412	0.124	0.1369	0.0789	0.1267	0.09	0.1254	0.0965	0.0899	0.0905	0.0785	0.0993	0.0902	0.1287	0.1242	0.139	0.1267	0.1131	0.11	0.1095	0.096	0.1098	0.086	0.0931	0.1073	0.1434	0.1247	0.1062	0.1507	0.0992	0.0746	0.0957	0.0944	0.1724	0.1134	0.1089	0.078	0.0927	0.0902	0.0866	0.1126	0.115	0.1148
B98	614.969	0.10766	0.022778	0.1316	0.1102	0.0828	0.1419	0.1235	0.1353	0.0783	0.1269	0.0899	0.1252	0.0953	0.0888	0.0899	0.0768	0.0981	0.0899	0.129	0.1244	0.1378	0.1254	0.1116	0.109	0.1082	0.0952	0.1096	0.0845	0.0921	0.1059	0.1433	0.1235	0.1051	0.1494	0.0982	0.0739	0.0943	0.093	0.1723	0.1121	0.1073	0.0769	0.0911	0.0881	0.0849	0.1118	0.1138	0.1138
B99	617.191	0.107293	0.0228521	0.1308	0.1106	0.0831	0.142	0.1234	0.1333	0.0781	0.1262	0.0894	0.1252	0.0945	0.0881	0.0895	0.0762	0.0979	0.0892	0.1292	0.1236	0.1384	0.125	0.1111	0.1074	0.1078	0.0947	0.1101	0.0832	0.0916	0.1047	0.1428	0.123	0.1041	0.1493	0.0979	0.0735	0.0943	0.0922	0.1717	0.1119	0.1073	0.0761	0.0908	0.0881	0.0841	0.1109	0.1138	0.1141
B100	619.412	0.106559	0.0229276	0.1304	0.1101	0.0823	0.1423	0.1228	0.1322	0.0774	0.1249	0.0889	0.1257	0.094	0.0869	0.0891	0.075	0.0975	0.089	0.1278	0.123	0.1385	0.1245	0.11	0.1056	0.1069	0.0945	0.1093	0.0818	0.0905	0.1034	0.1429	0.1219	0.1032	0.1489	0.0967	0.0729	0.0936	0.0914	0.1708	0.111	0.1064	0.0757	0.0897	0.0867	0.0834	0.1097	0.1122	0.1132
B101	621.633	0.106453	0.0229562	0.1309	0.1103	0.0819	0.1431	0.1228	0.131	0.0772	0.1235	0.0878	0.1255	0.0938	0.0872	0.0886	0.0753	0.0971	0.0891	0.1276	0.1222	0.1384	0.1239	0.1085	0.1047	0.1074	0.0942	0.1092	0.0815	0.0907	0.1034	0.1429	0.1214	0.1033	0.1496	0.0956	0.073	0.0941	0.0911	0.1711	0.1115	0.1067	0.0762	0.0896	0.087	0.0834	0.1084	0.1128	0.1134
B102	623.854	0.106319	0.0230649	0.1319	0.11	0.0809	0.1433	0.1231	0.1316	0.076	0.1242	0.0869	0.1246	0.093	0.0869	0.0882	0.0747	0.0972	0.0889	0.1268	0.1218	0.1392	0.124	0.1085	0.1052	0.1069	0.0944	0.1089	0.0818	0.0911	0.1035	0.1433	0.1218	0.1032	0.1493	0.0952	0.0732	0.094	0.0907	0.1698	0.1112	0.1068	0.0766	0.0904	0.0872	0.0827	0.1091	0.1135	0.1134
B103	626.075	0.106886	0.0231525	0.1316	0.1104	0.0814	0.1436	0.1241	0.1331	0.076	0.1253	0.0865	0.1252	0.0928	0.0875	0.088	0.0758	0.0981	0.09	0.1277	0.122	0.1403	0.1239	0.1086	0.1056	0.108	0.0953	0.1089	0.0818	0.0916	0.1035	0.1437	0.1227	0.1043	0.1501	0.0949	0.0748	0.0951	0.0905	0.1701	0.1117	0.1076	0.0772	0.0915	0.0879	0.0836	0.1096	0.1147	0.1139
B104	628.296	0.10699	0.0232739	0.1318	0.1103	0.0809	0.1432	0.1255	0.1342	0.0761	0.1258	0.086	0.1255	0.0925	0.0869	0.0888	0.0758	0.0983	0.09	0.1274	0.1216	0.1407	0.1244	0.1082	0.1066	0.1076	0.0947	0.1092	0.0816	0.0919	0.1042	0.1442	0.123	0.1046	0.1502	0.0951	0.0747	0.0958	0.0905	0.1702	0.1115	0.1063	0.0779	0.0913	0.0889	0.0831	0.1098	0.1143	0.1144
B105	630.517	0.107694	0.0233381	0.1325	0.1118	0.0816	0.1432	0.1257	0.1355	0.077	0.1275	0.0864	0.1256	0.0938	0.0872	0.0895	0.0766	0.0983	0.0901	0.1281	0.1212	0.1414	0.1249	0.109	0.1077	0.1086	0.0942	0.1101	0.0824	0.0921	0.1045	0.1443	0.1239	0.1055	0.1513	0.0957	0.0748	0.0973	0.0914	0.1712	0.1117	0.1072	0.0777	0.0923	0.0904	0.0836	0.1111	0.1143	0.1157
B106	632.738	0.10776	0.0236203	0.1325	0.1116	0.0819	0.1432	0.1248	0.1363	0.078	0.1288	0.0864	0.1266	0.0938	0.0873	0.0894	0.0767	0.0979	0.0896	0.1296	0.1205	0.1418	0.126	0.1101	0.1073	0.108	0.0941	0.1093	0.0818	0.0916	0.1044	0.1448	0.1244	0.1057	0.1518	0.0955	0.0745	0.0975	0.0923	0.1727	0.1118	0.1078	0.0776	0.0926	0.0906	0.0836	0.1118	0.1142	0.1153
B107	634.959	0.107954	0.0237492	0.1327	0.1115	0.0827	0.1428	0.1245	0.1366	0.0785	0.1288	0.0866	0.1272	0.0948	0.0873	0.0892	0.0772	0.0971	0.09	0.1308	0.1215	0.1421	0.1263	0.11	0.1078	0.1083	0.0945	0.1094	0.0818	0.0913	0.104	0.1442	0.1259	0.106	0.1515	0.0956	0.0755	0.097	0.0925	0.1747	0.1115	0.1087	0.0769	0.0935	0.09	0.0837	0.1118	0.115	0.1144
B108	637.18	0.107587	0.0239627	0.1328	0.1119	0.082	0.1432	0.1236	0.1364	0.0782	0.1292	0.0864	0.128	0.0945	0.0873	0.0889	0.0763	0.0964	0.0892	0.1314	0.1219	0.1427	0.1266	0.1091	0.107	0.1068	0.094	0.1098	0.0811	0.0907	0.1034	0.1436	0.1254	0.1059	0.1505	0.0953	0.0748	0.0963	0.0924	0.1757	0.1103	0.1076	0.0758	0.0925	0.0881	0.0832	0.1114	0.1154	0.1135
B109	639.401	0.107647	0.0240424	0.1325	0.1127	0.0821	0.143	0.1221	0.1365	0.0781	0.1284	0.0855	0.1286	0.0942	0.0881	0.0889	0.0758	0.0967	0.0888	0.1318	0.1216	0.1434	0.1268	0.1094	0.1071	0.1066	0.094	0.1113	0.0809	0.0906	0.1035	0.1431	0.1253	0.1059	0.1505	0.0954	0.0743	0.0964	0.0929	0.1762	0.1103	0.1084	0.0761	0.0922	0.0881	0.0831	0.1109	0.1162	0.1141
B110	641.622	0.107116	0.0241355	0.1328	0.1124	0.0809	0.144	0.1209	0.1354	0.0772	0.1275	0.0849	0.1293	0.0937	0.0874	0.0883	0.0751	0.0953	0.0894	0.1316	0.1216	0.1424	0.1272	0.1082	0.1065	0.1065	0.0936	0.1109	0.0809	0.0907	0.1027	0.1426	0.1251	0.106	0.1499	0.0961	0.0741	0.0946	0.0921	0.1756	0.1095	0.1078	0.0754	0.0901	0.0878	0.0829	0.1103	0.1166	0.1121
B111	643.844	0.10686	0.0241807	0.1333	0.1111	0.0805	0.1444	0.1207	0.1339	0.0769	0.1264	0.0843	0.1284	0.0932	0.088	0.0879	0.0744	0.0947	0.0896	0.1321	0.1213	0.1417	0.1278	0.1067	0.1068	0.1064	0.0929	0.1112	0.0808	0.0915	0.1027	0.1415	0.1255	0.1054	0.1504	0.0951	0.0745	0.0942	0.0914	0.1761	0.1097	0.1079	0.0754	0.0895	0.0884	0.0838	0.1097	0.1174	0.1112
B112	646.065	0.106379	0.0243192	0.1329	0.1096	0.0798	0.1446	0.1197	0.1336	0.0755	0.1269	0.0833	0.1279	0.092	0.0877	0.0872	0.073	0.0942	0.089	0.131	0.1211	0.141	0.1271	0.1066	0.1076	0.106	0.0928	0.1106	0.08	0.092	0.1014	0.1416	0.1256	0.1053	0.1501	0.0945	0.074	0.093	0.0902	0.1753	0.1093	0.1074	0.0755	0.0884	0.0879	0.083	0.1107	0.1168	0.1104
B113	648.286	0.106747	0.0242477	0.1324	0.1102	0.0802	0.1447	0.1202	0.1328	0.076	0.1282	0.0829	0.1274	0.0917	0.0883	0.0875	0.0737	0.0951	0.0892	0.1313	0.1219	0.1403	0.1261	0.1065	0.1081	0.107	0.093	0.1111	0.0804	0.0918	0.1016	0.1417	0.1261	0.1052	0.1517	0.0951	0.0744	0.0933	0.0898	0.1747	0.1098	0.1073	0.0761	0.0884	0.0888	0.0845	0.1112	0.1171	0.1114
B114	650.507	0.106724	0.0243239	0.1321	0.1099	0.0799	0.1454	0.1221	0.1325	0.0757	0.1285	0.0832	0.1271	0.0913	0.0881	0.088	0.0734	0.0952	0.0898	0.1299	0.1221	0.1392	0.1266	0.1065	0.1083	0.1067	0.0922	0.1119	0.0804	0.0919	0.1018	0.1416	0.1268	0.1047	0.1532	0.0955	0.0739	0.0937	0.0884	0.1741	0.1108	0.107	0.0763	0.0885	0.0885	0.0841	0.1118	0.1162	0.1118
B115	652.728	0.107146	0.0243555	0.1318	0.1103	0.0807	0.1452	0.1229	0.1335	0.0761	0.1288	0.0838	0.1273	0.0912	0.088	0.0886	0.0745	0.0958	0.0902	0.1294	0.1216	0.1385	0.1271	0.1074	0.1078	0.1078	0.092	0.1122	0.0811	0.0919	0.1019	0.1409	0.1275	0.1045	0.1543	0.0959	0.074	0.0948	0.0886	0.1752	0.1113	0.1084	0.0763	0.0896	0.089	0.0841	0.1124	0.1158	0.1125
B116	654.949	0.106723	0.0243575	0.1308	0.1095	0.0805	0.1447	0.123	0.1328	0.0763	0.1279	0.083	0.1272	0.0905	0.0878	0.0878	0.0749	0.0955	0.0902	0.1285	0.1206	0.1368	0.1278	0.1072	0.1065	0.1071	0.0918	0.1111	0.0807	0.0911	0.1024	0.1408	0.1265	0.1036	0.1537	0.0954	0.0733	0.0943	0.0882	0.1751	0.1114	0.1087	0.0761	0.0897	0.0886	0.0836	0.1121	0.1153	0.1123
B117	657.17	0.106656	0.0242374	0.1312	0.1093	0.0809	0.1442	0.1233	0.1319	0.0765	0.1278	0.0834	0.1278	0.0909	0.0876	0.0877	0.0753	0.0949	0.0904	0.1278	0.1203	0.1357	0.1284	0.107	0.1063	0.1073	0.0913	0.1109	0.0809	0.0908	0.1026	0.1405	0.1254	0.1041	0.1522	0.0951	0.0734	0.0935	0.0878	0.175	0.1106	0.1092	0.0763	0.0902	0.0879	0.0834	0.1115	0.1156	0.1122
B118	659.391	0.105937	0.024166	0.1303	0.1095	0.0797	0.1431	0.1226	0.1316	0.0759	0.128	0.0835	0.1276	0.0901	0.0873	0.0872	0.0748	0.0945	0.0894	0.1264	0.1187	0.1356	0.1282	0.1055	0.1057	0.106	0.0906	0.1104	0.0799	0.0895	0.1022	0.1405	0.1236	0.1033	0.1497	0.0939	0.0724	0.0934	0.0875	0.1741	0.1092	0.1087	0.0756	0.0894	0.0866	0.0832	0.1101	0.1153	0.1121
B119	661.612	0.10565	0.0240557	0.1301	0.1098	0.0794	0.1416	0.1209	0.1311	0.0759	0.1276	0.0832	0.1275	0.0898	0.0868	0.0877	0.0744	0.0941	0.0884	0.1265	0.1179	0.1363	0.1285	0.1053	0.1053	0.1054	0.09	0.111	0.0794	0.0894	0.1012	0.1401	0.1222	0.1035	0.149	0.0928	0.0725	0.093	0.0875	0.1732	0.1091	0.1095	0.0756	0.0891	0.087	0.0832	0.1091	0.1154	0.1113
B120	663.833	0.104663	0.0239722	0.1293	0.1091	0.0778	0.1411	0.1194	0.1292	0.0754	0.1275	0.083	0.1266	0.0888	0.0859	0.0866	0.074	0.0927	0.0878	0.1269	0.1161	0.1359	0.1285	0.1037	0.1044	0.1035	0.0889	0.1102	0.0788	0.0886	0.1004	0.1388	0.1207	0.1027	0.1469	0.0919	0.0721	0.0918	0.087	0.171	0.1073	0.1086	0.0745	0.0874	0.0864	0.0824	0.1081	0.1151	0.109
B121	666.054	0.104149	0.023887	0.1289	0.1079	0.0778	0.1406	0.1179	0.1286	0.0756	0.1269	0.0819	0.1253	0.0887	0.0856	0.0863	0.0734	0.0922	0.0869	0.1272	0.1144	0.1358	0.1279	0.1027	0.1045	0.1024	0.0891	0.1107	0.0783	0.0885	0.0999	0.1373	0.1198	0.1021	0.147	0.0905	0.0719	0.0915	0.0871	0.1707	0.1066	0.1084	0.0748	0.0867	0.0865	0.0819	0.1071	0.1146	0.1088
B122	668.275	0.103449	0.0239021	0.1279	0.1064	0.0768	0.1404	0.1161	0.1274	0.0748	0.1272	0.0811	0.1248	0.0885	0.0851	0.085	0.0725	0.091	0.0858	0.1268	0.1133	0.1352	0.1261	0.1018	0.1046	0.1018	0.0887	0.1105	0.0772	0.0877	0.0983	0.1366	0.119	0.1013	0.1468	0.0902	0.0709	0.0914	0.0867	0.1695	0.1058	0.1066	0.0739	0.0857	0.0857	0.0814	0.1075	0.1135	0.1073
B123	670.496	0.103764	0.023749	0.1273	0.1067	0.0773	0.1404	0.1164	0.126	0.0755	0.1285	0.0811	0.1244	0.0887	0.0859	0.085	0.073	0.0921	0.086	0.1271	0.1131	0.1353	0.1255	0.1021	0.1051	0.1022	0.0888	0.1123	0.0779	0.088	0.0989	0.1359	0.1194	0.1009	0.1485	0.091	0.0715	0.0925	0.0869	0.1685	0.1058	0.1067	0.0745	0.0867	0.0869	0.0822	0.1071	0.114	0.108
B124	672.718	0.103559	0.0236838	0.127	0.1063	0.077	0.1409	0.117	0.1259	0.0748	0.1284	0.0817	0.1239	0.0885	0.0861	0.0844	0.0726	0.0924	0.0867	0.126	0.1131	0.136	0.1247	0.1023	0.1044	0.1019	0.0886	0.1121	0.0778	0.0882	0.0983	0.1347	0.1193	0.1005	0.148	0.091	0.0718	0.0924	0.0869	0.1678	0.1058	0.1067	0.0746	0.0867	0.0857	0.0814	0.1076	0.1136	0.1079
B125	674.939	0.104044	0.0236698	0.1267	0.1047	0.0777	0.1407	0.1171	0.126	0.0748	0.1287	0.0819	0.124	0.0884	0.0859	0.0851	0.0739	0.0936	0.0874	0.1269	0.1139	0.1362	0.126	0.1031	0.1047	0.1025	0.0885	0.1129	0.0784	0.0885	0.0992	0.1341	0.1193	0.1009	0.1479	0.0924	0.0726	0.0929	0.0868	0.1699	0.1051	0.1072	0.0754	0.0874	0.0867	0.0818	0.1078	0.1133	0.1088
B126	677.16	0.104004	0.0236097	0.1265	0.1034	0.0773	0.1413	0.1172	0.125	0.0743	0.1289	0.0822	0.124	0.089	0.0862	0.085	0.0744	0.0941	0.0876	0.1265	0.1137	0.135	0.1265	0.1033	0.1044	0.1028	0.0885	0.1121	0.0786	0.0884	0.0998	0.1345	0.1189	0.1007	0.1472	0.093	0.0724	0.0927	0.0861	0.1695	0.1039	0.1071	0.0755	0.087	0.087	0.0812	0.1078	0.1131	0.1096
B127	679.381	0.105567	0.023564	0.1289	0.1039	0.0794	0.1434	0.1185	0.1259	0.0755	0.131	0.0844	0.1265	0.0905	0.0872	0.0869	0.0765	0.0953	0.0893	0.127	0.1161	0.1358	0.1287	0.1042	0.1058	0.1044	0.0892	0.1136	0.0801	0.09	0.1014	0.1364	0.1208	0.1026	0.1475	0.0948	0.0746	0.0943	0.0869	0.1702	0.1042	0.1097	0.0772	0.0892	0.0877	0.0835	0.1095	0.1155	0.112
B128	681.602	0.10749	0.023583	0.1298	0.1054	0.0814	0.1448	0.1195	0.1279	0.077	0.1329	0.0874	0.1295	0.0925	0.0888	0.0891	0.0785	0.0972	0.0921	0.1273	0.1182	0.1389	0.1311	0.1062	0.1079	0.1056	0.0913	0.1153	0.0818	0.0923	0.103	0.1391	0.1222	0.1046	0.1483	0.0961	0.076	0.0961	0.0887	0.1725	0.1059	0.1126	0.0788	0.0911	0.0897	0.0856	0.1106	0.1179	0.1138
B129	683.823	0.110473	0.0235904	0.1322	0.1085	0.0841	0.1468	0.1216	0.1296	0.0801	0.1356	0.0911	0.1334	0.0959	0.0909	0.0932	0.0816	0.1004	0.0948	0.1302	0.122	0.1428	0.1344	0.1095	0.1107	0.1075	0.094	0.1186	0.0853	0.0959	0.1054	0.1419	0.1264	0.1079	0.1518	0.0989	0.0789	0.0991	0.0917	0.1756	0.1094	0.1165	0.0814	0.0944	0.0932	0.0885	0.1133	0.1219	0.1158
B130	686.044	0.113006	0.0237917	0.1357	0.1117	0.0858	0.149	0.1238	0.133	0.0826	0.1379	0.0934	0.1362	0.0985	0.0939	0.0962	0.0841	0.1015	0.0974	0.1319	0.125	0.1459	0.1366	0.1118	0.1133	0.1095	0.0962	0.1209	0.0885	0.0984	0.1078	0.1488	0.1302	0.1107	0.1549	0.1015	0.0808	0.1019	0.0939	0.1787	0.1119	0.119	0.0836	0.097	0.0959	0.0904	0.1161	0.1255	0.1176
B131	688.265	0.116196	0.0239414	0.1387	0.116	0.089	0.1522	0.1285	0.1369	0.0859	0.1401	0.0954	0.1391	0.1015	0.0966	0.0995	0.0866	0.1047	0.1006	0.1347	0.1276	0.1488	0.14	0.115	0.117	0.1131	0.1003	0.124	0.0917	0.1019	0.1105	0.1481	0.1337	0.1139	0.1601	0.1049	0.0834	0.1053	0.097	0.1823	0.1168	0.1217	0.0865	0.1006	0.0992	0.0931	0.1203	0.1292	0.121
B132	690.486	0.118891	0.0242523	0.1405	0.1192	0.0916	0.1559	0.1325	0.1397	0.0885	0.1424	0.097	0.1411	0.1033	0.0994	0.1013	0.0883	0.1068	0.1024	0.1375	0.1303	0.1516	0.1429	0.1179	0.119	0.1166	0.1037	0.1268	0.094	0.1039	0.1132	0.1492	0.1376	0.1164	0.1641	0.1085	0.0852	0.1084	0.1003	0.1864	0.122	0.1234	0.0871	0.1038	0.1012	0.0962	0.1246	0.1318	0.1228
B133	692.707	0.122571	0.0242473	0.1427	0.1246	0.0952	0.1584	0.1384	0.1438	0.0931	0.1457	0.1	0.1435	0.1067	0.1032	0.1054	0.0911	0.1109	0.1053	0.1413	0.1338	0.1563	0.1459	0.1229	0.122	0.12	0.1086	0.131	0.097	0.1077	0.1168	0.1502	0.1428	0.1188	0.1674	0.1131	0.089	0.1124	0.1042	0.1904	0.1273	0.1277	0.0899	0.1082	0.1056	0.0999	0.1293	0.136	0.1273
B134	694.928	0.126163	0.0243215	0.1459	0.1302	0.0978	0.1625	0.1446	0.1487	0.0964	0.1478	0.1028	0.1465	0.1099	0.1077	0.1095	0.0926	0.1154	0.1081	0.1449	0.1385	0.1616	0.148	0.1294	0.1253	0.1229	0.1138	0.1342	0.1008	0.1106	0.1205	0.1529	0.1459	0.1219	0.1687	0.117	0.0919	0.116	0.1085	0.1944	0.1324	0.13	0.0922	0.1132	0.1092	0.104	0.1354	0.1402	0.1308
B135	697.149	0.131033	0.0241707	0.1488	0.1344	0.1025	0.1665	0.1511	0.1541	0.1001	0.151	0.1076	0.1497	0.1153	0.1125	0.1159	0.0972	0.1211	0.1119	0.1488	0.1433	0.1671	0.1516	0.1366	0.1305	0.1277	0.1184	0.1397	0.105	0.1144	0.1281	0.1572	0.1511	0.1267	0.1722	0.122	0.0969	0.1223	0.113	0.1995	0.1374	0.1345	0.0968	0.1205	0.1152	0.1092	0.141	0.1452	0.137
B136	699.371	0.136264	0.0238469	0.1531	0.1403	0.1073	0.1714	0.1581	0.1597	0.1045	0.1541	0.1129	0.154	0.1214	0.1191	0.1209	0.1007	0.1281	0.1166	0.153	0.1489	0.1734	0.1552	0.145	0.1351	0.1318	0.1252	0.1433	0.1103	0.1196	0.1346	0.1625	0.1549	0.1313	0.1767	0.1283	0.1015	0.1293	0.1173	0.2023	0.1422	0.1394	0.1019	0.1283	0.1206	0.1138	0.1474	0.1511	0.1427
B137	701.592	0.143493	0.0232531	0.1575	0.1479	0.1161	0.1773	0.1667	0.1677	0.1117	0.1595	0.1214	0.1599	0.1293	0.1267	0.1292	0.1076	0.1364	0.1235	0.1585	0.1567	0.1822	0.1601	0.1542	0.1424	0.1363	0.1323	0.1511	0.1185	0.1273	0.1437	0.1698	0.1612	0.1382	0.1816	0.1369	0.109	0.1377	0.124	0.2063	0.1499	0.1468	0.1082	0.1389	0.1277	0.1216	0.1564	0.1603	0.1509
B138	703.813	0.150909	0.0226898	0.1614	0.1561	0.123	0.1825	0.1751	0.1748	0.1186	0.1645	0.131	0.1662	0.1366	0.1348	0.1371	0.1156	0.1444	0.132	0.1643	0.1652	0.1928	0.1643	0.1645	0.1504	0.1407	0.1391	0.1581	0.1274	0.1357	0.1516	0.1792	0.1665	0.1464	0.1856	0.1457	0.1157	0.1466	0.1309	0.2108	0.1588	0.1529	0.1161	0.1475	0.1361	0.1292	0.1651	0.168	0.1582
B139	706.034	0.159131	0.0218281	0.1671	0.1652	0.1306	0.1878	0.1842	0.1812	0.1282	0.1715	0.1419	0.1741	0.1471	0.1448	0.1466	0.1243	0.154	0.141	0.1717	0.1743	0.201	0.1702	0.1753	0.1581	0.1468	0.1464	0.1678	0.1389	0.1445	0.1595	0.1889	0.172	0.1542	0.1916	0.155	0.1241	0.1565	0.1404	0.2154	0.1687	0.1602	0.1245	0.1597	0.1456	0.1373	0.1742	0.1757	0.1663
B140	708.255	0.166776	0.0211071	0.175	0.1743	0.1388	0.1921	0.1932	0.1888	0.1357	0.1761	0.151	0.1802	0.1562	0.1527	0.1556	0.1315	0.1613	0.1501	0.1771	0.1825	0.2087	0.176	0.1842	0.1668	0.1535	0.1525	0.1741	0.1493	0.1522	0.1659	0.2006	0.1755	0.1617	0.1979	0.1654	0.1327	0.1647	0.1487	0.2198	0.1774	0.1681	0.1318	0.1701	0.1552	0.1464	0.1842	0.1832	0.1744
B141	710.476	0.175606	0.0200892	0.1823	0.1843	0.1492	0.1971	0.2038	0.1955	0.1465	0.1804	0.1608	0.1882	0.1653	0.1634	0.1657	0.1415	0.1718	0.1609	0.1856	0.1895	0.2168	0.1851	0.1949	0.1769	0.161	0.1594	0.1807	0.159	0.161	0.1756	0.206	0.1815	0.1689	0.2041	0.1773	0.1434	0.1746	0.1579	0.2239	0.1885	0.1759	0.1396	0.1807	0.1654	0.1568	0.1953	0.1913	0.1856
B142	712.697	0.184271	0.0191592	0.1897	0.1926	0.1587	0.2037	0.2135	0.2011	0.1569	0.1871	0.1728	0.1942	0.1744	0.1754	0.1739	0.1508	0.1813	0.1706	0.1948	0.197	0.2239	0.1929	0.2055	0.1848	0.17	0.1677	0.189	0.169	0.1703	0.1851	0.214	0.1884	0.1764	0.209	0.1903	0.1532	0.1839	0.1707	0.2289	0.1994	0.1839	0.1489	0.1921	0.1751	0.1671	0.2054	0.1986	0.1959
B143	714.918	0.194259	0.0180448	0.1997	0.2041	0.17	0.2087	0.2251	0.2065	0.1699	0.1943	0.184	0.2021	0.1856	0.1887	0.184	0.1617	0.193	0.1833	0.2047	0.206	0.2326	0.201	0.2171	0.1946	0.1785	0.1773	0.1987	0.1802	0.181	0.1947	0.2209	0.1965	0.1841	0.2141	0.2039	0.1651	0.1943	0.1841	0.2328	0.2098	0.1929	0.1602	0.205	0.1885	0.1797	0.2181	0.2095	0.2076
B144	717.139	0.204333	0.0173619	0.2084	0.2152	0.1821	0.2155	0.2367	0.2137	0.1806	0.2005	0.1967	0.211	0.1955	0.2024	0.1938	0.1732	0.2061	0.1942	0.2131	0.2163	0.2408	0.2078	0.2291	0.2032	0.1874	0.1875	0.2086	0.1926	0.1914	0.2044	0.2289	0.2045	0.1934	0.2183	0.2162	0.1764	0.2031	0.197	0.2377	0.2205	0.1992	0.1725	0.2202	0.2008	0.1922	0.2312	0.2195	0.2168
B145	719.36	0.215186	0.0164955	0.2159	0.2254	0.1957	0.2207	0.2487	0.2201	0.1924	0.2084	0.2107	0.2199	0.2089	0.2165	0.204	0.1871	0.2189	0.206	0.2192	0.2256	0.2516	0.2151	0.2425	0.2136	0.1977	0.1963	0.2179	0.2065	0.2051	0.2172	0.2354	0.2122	0.2033	0.225	0.2288	0.1894	0.2153	0.2107	0.2427	0.23	0.2087	0.186	0.236	0.2148	0.2058	0.2415	0.2311	0.2305
B146	721.581	0.225816	0.0162404	0.2239	0.2361	0.2083	0.2272	0.2611	0.2272	0.205	0.2151	0.2254	0.229	0.2186	0.2326	0.2127	0.1991	0.2315	0.2184	0.2264	0.2356	0.2643	0.2231	0.2559	0.2235	0.2055	0.2065	0.2266	0.2211	0.2187	0.2283	0.2417	0.2174	0.2125	0.2302	0.2417	0.2026	0.2295	0.2229	0.246	0.2383	0.2177	0.2002	0.2516	0.2277	0.2186	0.2512	0.2426	0.2409
B147	723.802	0.237116	0.0164748	0.2284	0.2473	0.2225	0.2337	0.275	0.2346	0.219	0.2232	0.2436	0.2395	0.2302	0.2476	0.2227	0.2139	0.2442	0.2312	0.2347	0.2426	0.2761	0.2304	0.2687	0.2331	0.2125	0.216	0.2384	0.2372	0.2323	0.2404	0.2483	0.2248	0.2226	0.2345	0.2549	0.2177	0.2442	0.2378	0.25	0.2482	0.2267	0.2143	0.2655	0.2422	0.2318	0.2619	0.2547	0.2522
B148	726.023	0.247556	0.0173563	0.2318	0.2571	0.234	0.2382	0.288	0.2415	0.2306	0.2299	0.2596	0.2462	0.2408	0.2642	0.2332	0.2267	0.2559	0.2441	0.2413	0.2523	0.2865	0.2385	0.2789	0.2414	0.22	0.2252	0.248	0.2552	0.2449	0.2488	0.2533	0.2302	0.2348	0.2378	0.2674	0.2315	0.2581	0.2518	0.254	0.2572	0.2359	0.2292	0.2782	0.2543	0.2447	0.2737	0.2659	0.262
B149	728.245	0.257984	0.0191764	0.2355	0.2673	0.2455	0.2436	0.2982	0.2467	0.2457	0.2353	0.2766	0.2534	0.2543	0.2792	0.2436	0.2417	0.2676	0.2559	0.2468	0.2584	0.2953	0.2433	0.2908	0.2501	0.2276	0.2333	0.2603	0.273	0.2582	0.2597	0.2568	0.2346	0.24	0.2432	0.2802	0.2489	0.2738	0.2674	0.2563	0.2654	0.2437	0.2416	0.2932	0.2681	0.2585	0.2866	0.2751	0.2721
B150	730.466	0.267787	0.0214715	0.2403	0.2778	0.2592	0.2485	0.3091	0.2522	0.2573	0.2391	0.291	0.2606	0.2657	0.2909	0.2532	0.2549	0.279	0.2681	0.2519	0.2659	0.3057	0.2482	0.3013	0.2596	0.232	0.2417	0.2674	0.2879	0.2698	0.2696	0.2617	0.2383	0.2481	0.2474	0.2935	0.2649	0.2869	0.2802	0.2601	0.275	0.2505	0.253	0.3058	0.282	0.273	0.2987	0.2846	0.2819
B151	732.687	0.278627	0.0243693	0.2462	0.2875	0.2739	0.2521	0.3223	0.2568	0.2723	0.2432	0.3088	0.2696	0.2772	0.3061	0.2626	0.2728	0.293	0.2784	0.2599	0.2728	0.3156	0.2547	0.3142	0.2705	0.238	0.2502	0.2766	0.3025	0.2839	0.2824	0.2684	0.2455	0.2553	0.25	0.3087	0.2815	0.3027	0.2941	0.2619	0.2825	0.2572	0.2662	0.3177	0.2972	0.2861	0.3113	0.2945	0.2945
B152	734.908	0.28863	0.0273133	0.2517	0.2958	0.2881	0.2569	0.334	0.261	0.2849	0.2495	0.3239	0.2748	0.2881	0.3206	0.2718	0.2881	0.3061	0.2911	0.2679	0.2795	0.3221	0.2595	0.326	0.2777	0.2436	0.2568	0.2857	0.3165	0.2946	0.2938	0.2747	0.2515	0.2637	0.2524	0.325	0.296	0.3179	0.3107	0.2637	0.2912	0.2645	0.2803	0.3295	0.3118	0.2983	0.3235	0.3017	0.3059
B153	737.129	0.299069	0.0304596	0.2577	0.3049	0.3045	0.2605	0.345	0.2658	0.3012	0.2549	0.3371	0.2811	0.3001	0.3334	0.2827	0.3048	0.322	0.3036	0.2769	0.2865	0.3312	0.2658	0.3398	0.2873	0.2506	0.2665	0.2963	0.3304	0.3077	0.3038	0.2811	0.2578	0.2733	0.2533	0.3395	0.3086	0.3285	0.3247	0.2632	0.298	0.2712	0.2932	0.3425	0.3282	0.3119	0.3344	0.3107	0.3163
B154	739.35	0.308161	0.0336874	0.2627	0.3131	0.3202	0.2621	0.3542	0.2702	0.3135	0.2609	0.3528	0.2883	0.3104	0.3438	0.2915	0.3228	0.3352	0.3123	0.2831	0.2918	0.3383	0.2684	0.3519	0.2935	0.256	0.2743	0.3013	0.3436	0.3186	0.3134	0.2872	0.2638	0.2817	0.2552	0.3515	0.3209	0.3367	0.3362	0.2648	0.3068	0.2755	0.3073	0.3546	0.3428	0.324	0.3456	0.3191	0.3236
B155	741.571	0.316609	0.0368722	0.266	0.318	0.3344	0.2618	0.3606	0.2736	0.3268	0.2662	0.3668	0.2947	0.3203	0.3542	0.2995	0.3376	0.3458	0.3234	0.2882	0.2976	0.3452	0.273	0.3631	0.3016	0.2612	0.2806	0.3043	0.3581	0.3309	0.3232	0.2911	0.2667	0.289	0.2585	0.3635	0.3341	0.3456	0.3466	0.2663	0.3137	0.2807	0.3214	0.366	0.357	0.3358	0.3521	0.3266	0.3327
B156	743.792	0.323773	0.0394218	0.2708	0.3231	0.3467	0.265	0.3672	0.2772	0.3362	0.2699	0.3808	0.3005	0.325	0.3659	0.3061	0.3489	0.3558	0.335	0.2933	0.3008	0.3509	0.2773	0.3689	0.3081	0.2647	0.2861	0.309	0.3712	0.3386	0.33	0.2976	0.2687	0.2971	0.2592	0.3719	0.3452	0.3525	0.3558	0.2684	0.3199	0.2867	0.3333	0.3748	0.3686	0.3481	0.358	0.3328	0.3401
B157	746.013	0.330534	0.0414193	0.2738	0.3297	0.358	0.2666	0.3738	0.28	0.3449	0.2733	0.3914	0.3082	0.3321	0.3759	0.3115	0.3579	0.3633	0.3448	0.2999	0.3038	0.3539	0.2827	0.3736	0.3159	0.2692	0.2907	0.3141	0.3818	0.3465	0.3369	0.3015	0.2713	0.3042	0.2609	0.3805	0.3572	0.3586	0.3654	0.2703	0.326	0.2934	0.3449	0.3798	0.3785	0.3564	0.3654	0.3393	0.3478
B158	748.234	0.334783	0.0434701	0.2749	0.3321	0.3654	0.266	0.3791	0.281	0.349	0.2754	0.399	0.3092	0.3377	0.3853	0.3156	0.3619	0.368	0.3539	0.3019	0.3079	0.3542	0.2858	0.3772	0.3199	0.2713	0.2929	0.3178	0.3927	0.3525	0.3416	0.3045	0.2734	0.3102	0.2617	0.3881	0.366	0.3606	0.3729	0.2732	0.3291	0.2972	0.3537	0.3839	0.3846	0.3637	0.372	0.3436	0.3521
B159	750.455	0.338853	0.0455517	0.2777	0.3371	0.3704	0.2692	0.3812	0.2808	0.3541	0.2753	0.4081	0.3117	0.3433	0.3919	0.3191	0.3701	0.3714	0.3603	0.3038	0.31	0.3576	0.287	0.3821	0.3224	0.2725	0.2938	0.3222	0.3989	0.3586	0.347	0.3051	0.2747	0.3101	0.2649	0.3952	0.377	0.3661	0.3783	0.2756	0.3316	0.2986	0.3588	0.3928	0.3907	0.37	0.378	0.3462	0.355
B160	752.676	0.344327	0.0464332	0.2824	0.3422	0.3765	0.2755	0.3877	0.2862	0.3599	0.2812	0.4156	0.3172	0.3493	0.4	0.323	0.3779	0.3762	0.3668	0.3068	0.3156	0.3629	0.2931	0.3845	0.3254	0.2742	0.2994	0.3281	0.4069	0.3655	0.3517	0.3077	0.2793	0.3178	0.2697	0.3996	0.3853	0.3702	0.3868	0.2803	0.3382	0.302	0.364	0.3986	0.3968	0.3747	0.3819	0.3531	0.3618
B161	754.898	0.352209	0.0467577	0.2916	0.3497	0.3824	0.2838	0.3969	0.2953	0.3692	0.2898	0.4259	0.3257	0.3577	0.4093	0.3268	0.3888	0.3841	0.3724	0.3127	0.3239	0.3666	0.3023	0.3893	0.332	0.2816	0.3064	0.3379	0.4159	0.374	0.3575	0.315	0.2893	0.3254	0.2785	0.409	0.3959	0.3798	0.3959	0.2857	0.3433	0.3096	0.3708	0.4053	0.4032	0.3809	0.3887	0.3618	0.3697
B162	757.119	0.360059	0.0465294	0.2995	0.3569	0.3873	0.2947	0.4037	0.3034	0.3773	0.2989	0.4339	0.3341	0.3658	0.4172	0.3358	0.3994	0.3897	0.3827	0.3203	0.3322	0.3736	0.3108	0.3955	0.3391	0.2913	0.3129	0.3451	0.4219	0.3779	0.3647	0.3226	0.2991	0.3311	0.2862	0.4176	0.4054	0.3897	0.4053	0.2936	0.3522	0.3179	0.377	0.4126	0.4084	0.3863	0.3953	0.3694	0.3766
B163	759.34	0.367276	0.0465764	0.3053	0.3644	0.392	0.3042	0.4091	0.3109	0.3872	0.3071	0.4413	0.3394	0.3718	0.4218	0.3422	0.4101	0.3971	0.387	0.3285	0.3395	0.3828	0.3178	0.4026	0.3485	0.3015	0.3225	0.3542	0.4292	0.3845	0.3699	0.3278	0.3075	0.3379	0.2935	0.4243	0.4119	0.3962	0.4123	0.2984	0.3585	0.3237	0.3846	0.4198	0.4163	0.3924	0.3992	0.3779	0.3859
B164	761.561	0.371744	0.0467393	0.3077	0.3703	0.3951	0.3086	0.4113	0.3157	0.3941	0.3154	0.4459	0.3445	0.374	0.4227	0.347	0.419	0.3991	0.3905	0.3332	0.3432	0.3876	0.3197	0.4087	0.3519	0.3066	0.3267	0.355	0.4334	0.3868	0.3734	0.33	0.3119	0.3432	0.2987	0.425	0.4177	0.4011	0.4187	0.3028	0.3649	0.3279	0.3893	0.424	0.4216	0.3966	0.4048	0.3858	0.39
B165	763.782	0.37453	0.0472194	0.306	0.3714	0.3975	0.3108	0.4097	0.3181	0.398	0.3174	0.4493	0.3443	0.3745	0.4259	0.3504	0.4231	0.4004	0.3937	0.3352	0.3455	0.3894	0.3212	0.4107	0.3551	0.3108	0.3292	0.3564	0.4359	0.3894	0.375	0.3294	0.3144	0.3444	0.3017	0.4287	0.4226	0.4034	0.4216	0.3055	0.3666	0.3298	0.3948	0.4298	0.4243	0.4017	0.4069	0.3878	0.3929
B166	766.003	0.374959	0.0476352	0.3058	0.3708	0.4009	0.3115	0.4114	0.3187	0.3978	0.3172	0.4497	0.3438	0.3718	0.4267	0.3516	0.4228	0.4025	0.3949	0.3355	0.3429	0.3912	0.3203	0.4077	0.3571	0.3112	0.3292	0.3582	0.4386	0.3885	0.3722	0.3293	0.3118	0.344	0.2998	0.432	0.4218	0.402	0.4209	0.3054	0.3666	0.3304	0.3953	0.4295	0.424	0.4036	0.4083	0.3887	0.3964
B167	768.224	0.373301	0.0482925	0.3026	0.3697	0.4011	0.3049	0.4104	0.3156	0.3956	0.3115	0.4466	0.3418	0.3708	0.4273	0.3502	0.4194	0.4033	0.394	0.3336	0.3421	0.3902	0.3176	0.4084	0.3572	0.3078	0.3265	0.3554	0.4364	0.3874	0.3695	0.3257	0.3082	0.3413	0.2962	0.4318	0.4209	0.4015	0.4184	0.3006	0.3661	0.3287	0.3959	0.427	0.4237	0.4018	0.407	0.3863	0.3955
B168	770.445	0.369204	0.0494293	0.2977	0.3637	0.3985	0.2975	0.4102	0.309	0.3904	0.3038	0.4455	0.3371	0.3678	0.4269	0.3478	0.4157	0.4024	0.3922	0.3284	0.3391	0.3868	0.3121	0.4032	0.3531	0.3001	0.3218	0.3522	0.4337	0.3838	0.3655	0.322	0.3014	0.336	0.2887	0.4295	0.4137	0.3952	0.4151	0.2969	0.3608	0.3228	0.3919	0.4242	0.4219	0.4002	0.403	0.3799	0.3917
B169	772.666	0.36617	0.0502967	0.2949	0.3597	0.3955	0.2912	0.4085	0.3047	0.3863	0.2988	0.4436	0.3317	0.3656	0.4253	0.3467	0.4143	0.4036	0.3875	0.3245	0.3358	0.3836	0.3098	0.4003	0.3492	0.2947	0.3198	0.349	0.4319	0.3808	0.3626	0.3179	0.2968	0.3319	0.2835	0.4282	0.4103	0.394	0.4108	0.2934	0.3558	0.3196	0.39	0.4259	0.4196	0.3966	0.4028	0.3746	0.3873
B170	774.887	0.365049	0.0507609	0.2956	0.3569	0.3945	0.2873	0.4107	0.3066	0.3853	0.2973	0.4446	0.3296	0.3665	0.4263	0.3438	0.4125	0.4043	0.3864	0.3227	0.3348	0.381	0.3093	0.3957	0.3475	0.2904	0.3182	0.3476	0.4341	0.3824	0.3613	0.318	0.2978	0.3312	0.2804	0.427	0.41	0.3915	0.4108	0.291	0.3541	0.3169	0.388	0.4257	0.4192	0.3952	0.4008	0.373	0.3845
B171	777.108	0.366003	0.0507357	0.2989	0.3575	0.3949	0.2866	0.4138	0.3078	0.3868	0.2983	0.447	0.3295	0.3695	0.4281	0.3447	0.4146	0.4065	0.3858	0.3221	0.3375	0.3803	0.3126	0.3958	0.3483	0.2895	0.318	0.3472	0.4361	0.3846	0.3628	0.3202	0.3	0.3328	0.2822	0.4277	0.4131	0.3935	0.4103	0.2906	0.3527	0.3181	0.3889	0.4268	0.4186	0.3958	0.4011	0.3745	0.3846
B172	779.329	0.367093	0.0509725	0.2997	0.3589	0.3938	0.2863	0.416	0.3094	0.3873	0.2978	0.4513	0.3301	0.3705	0.4305	0.3477	0.417	0.4059	0.3856	0.3237	0.338	0.3827	0.3155	0.3963	0.3517	0.29	0.3203	0.3449	0.4382	0.3856	0.3672	0.3238	0.3025	0.3331	0.2814	0.4279	0.4154	0.3962	0.4123	0.2914	0.3547	0.3173	0.3897	0.4263	0.4193	0.3985	0.4026	0.3731	0.3863
B173	781.55	0.368583	0.0510311	0.3002	0.3623	0.392	0.2879	0.4185	0.3123	0.3905	0.2995	0.4505	0.3303	0.3689	0.4308	0.3471	0.4204	0.4057	0.3844	0.3266	0.3394	0.3844	0.3172	0.3978	0.3567	0.2906	0.3235	0.3448	0.4404	0.3869	0.3716	0.3264	0.3062	0.3366	0.283	0.4284	0.42	0.4	0.4133	0.2933	0.3556	0.3189	0.3934	0.4275	0.4229	0.3993	0.4023	0.3748	0.3901
B174	783.772	0.370271	0.0512631	0.2983	0.3665	0.3915	0.2888	0.4187	0.3155	0.3928	0.3037	0.4528	0.3335	0.3681	0.4307	0.3474	0.424	0.4034	0.3868	0.3287	0.3407	0.387	0.3193	0.4018	0.3586	0.2914	0.325	0.3425	0.4412	0.3874	0.3762	0.3292	0.3092	0.3407	0.2837	0.4253	0.4236	0.4041	0.4176	0.2946	0.355	0.3187	0.3953	0.4287	0.4263	0.4012	0.4041	0.3766	0.3886
B175	785.993	0.372633	0.0517349	0.2978	0.3698	0.3945	0.2923	0.4179	0.317	0.3957	0.3046	0.4565	0.3361	0.3691	0.4334	0.3475	0.4261	0.4044	0.3894	0.3318	0.341	0.39	0.3193	0.4036	0.3607	0.2929	0.3288	0.3445	0.4417	0.3888	0.3818	0.3314	0.3121	0.3403	0.2861	0.4305	0.4285	0.4087	0.4217	0.2978	0.3541	0.3226	0.397	0.4334	0.4271	0.4034	0.4062	0.3782	0.3908
B176	788.214	0.374566	0.0519353	0.3003	0.3715	0.3988	0.2955	0.4209	0.3197	0.4004	0.3063	0.4585	0.3399	0.3696	0.4339	0.3483	0.4262	0.4052	0.3909	0.3345	0.3414	0.3926	0.322	0.4068	0.3644	0.2939	0.3316	0.3488	0.4439	0.388	0.3831	0.3323	0.3126	0.3415	0.2861	0.4349	0.4287	0.4091	0.4239	0.2995	0.3556	0.3246	0.3951	0.4357	0.4284	0.4058	0.4063	0.3814	0.3945
B177	790.435	0.376266	0.052112	0.2987	0.3753	0.3995	0.2978	0.4222	0.3209	0.4	0.3059	0.4606	0.3455	0.375	0.4348	0.3471	0.4264	0.4097	0.3917	0.338	0.344	0.3928	0.3224	0.4097	0.3642	0.2933	0.334	0.3489	0.4434	0.3886	0.3865	0.3331	0.3131	0.3425	0.2875	0.4352	0.4297	0.4113	0.4265	0.3	0.3597	0.326	0.3963	0.4373	0.4333	0.4085	0.4054	0.3842	0.3948
B178	792.656	0.377094	0.0519481	0.302	0.3766	0.3984	0.3005	0.4229	0.3215	0.4004	0.3052	0.4615	0.35	0.3774	0.4369	0.3488	0.4256	0.4132	0.3947	0.3394	0.3475	0.3933	0.3229	0.4047	0.3664	0.2943	0.3363	0.3524	0.4418	0.3892	0.3876	0.3317	0.3125	0.3406	0.2864	0.4329	0.4273	0.4097	0.4286	0.3005	0.3592	0.3264	0.3952	0.439	0.4343	0.4103	0.4076	0.3833	0.3934
B179	794.877	0.378663	0.0516309	0.305	0.3786	0.4003	0.302	0.4217	0.322	0.4002	0.3074	0.4598	0.3516	0.3809	0.4365	0.3489	0.425	0.4197	0.3953	0.345	0.3488	0.3911	0.3229	0.4077	0.3688	0.2972	0.34	0.3544	0.4442	0.39	0.3874	0.3322	0.3168	0.3408	0.2878	0.4338	0.4276	0.4118	0.4273	0.3014	0.3604	0.3306	0.3989	0.4404	0.4362	0.4123	0.4142	0.3851	0.3949
B180	797.098	0.37963	0.0516695	0.3091	0.3796	0.4048	0.3037	0.4235	0.3208	0.4021	0.3075	0.46	0.3538	0.3844	0.4388	0.3484	0.4234	0.423	0.3987	0.3464	0.3526	0.3917	0.3236	0.4055	0.3716	0.2997	0.3374	0.3558	0.4494	0.3932	0.3861	0.3331	0.3188	0.341	0.2882	0.4355	0.4287	0.4114	0.4274	0.2997	0.3611	0.3302	0.3991	0.4418	0.4375	0.4138	0.417	0.3855	0.3943
B181	799.319	0.380343	0.0512772	0.3108	0.3772	0.4092	0.3043	0.4217	0.3194	0.4037	0.3099	0.4585	0.3556	0.3848	0.4408	0.3514	0.4252	0.424	0.3972	0.3462	0.3563	0.3958	0.3269	0.4072	0.372	0.3024	0.3348	0.357	0.4516	0.3967	0.3857	0.3308	0.3201	0.3427	0.2927	0.4354	0.43	0.4113	0.4301	0.2984	0.3626	0.3306	0.3979	0.4418	0.437	0.4145	0.4166	0.3905	0.3986
B182	801.54	0.380357	0.0512826	0.3118	0.3764	0.4103	0.3046	0.424	0.3216	0.4037	0.3099	0.4575	0.3537	0.384	0.4412	0.3508	0.425	0.4247	0.3973	0.3464	0.3562	0.3979	0.3296	0.4077	0.3724	0.3032	0.333	0.3548	0.4534	0.3984	0.3835	0.334	0.3204	0.3441	0.2927	0.4373	0.4286	0.4087	0.429	0.2998	0.3635	0.3278	0.398	0.4391	0.4363	0.416	0.4199	0.3887	0.4002
B183	803.761	0.38144	0.0509909	0.3134	0.3778	0.4112	0.3054	0.4242	0.3213	0.4064	0.3135	0.4579	0.3536	0.3828	0.4404	0.3495	0.4298	0.4243	0.3988	0.3482	0.3583	0.4018	0.3331	0.4086	0.3748	0.3057	0.3339	0.3524	0.4516	0.4003	0.382	0.3353	0.3253	0.3471	0.2964	0.4356	0.431	0.4113	0.4295	0.3031	0.3644	0.3281	0.4006	0.4414	0.4343	0.4149	0.4207	0.3893	0.3986
B184	805.982	0.382366	0.0510833	0.3131	0.3779	0.4128	0.3068	0.4254	0.3204	0.4074	0.3156	0.4618	0.3538	0.3825	0.4418	0.3477	0.434	0.4228	0.4035	0.3476	0.358	0.4047	0.3355	0.4123	0.3731	0.3086	0.3346	0.3511	0.4514	0.3999	0.3801	0.3375	0.326	0.3512	0.2984	0.4371	0.4335	0.4122	0.4277	0.305	0.3633	0.3257	0.4014	0.4423	0.4338	0.4153	0.421	0.3903	0.3965
B185	808.203	0.383984	0.0507973	0.3146	0.3816	0.4162	0.3096	0.4248	0.3206	0.4105	0.3158	0.4651	0.354	0.3833	0.4431	0.3516	0.4353	0.4203	0.4083	0.3502	0.3583	0.4088	0.3382	0.4154	0.3725	0.3117	0.3371	0.3536	0.4517	0.3996	0.3808	0.3404	0.3284	0.3547	0.3002	0.4394	0.4356	0.4149	0.4276	0.3087	0.3624	0.3276	0.4013	0.4437	0.4327	0.4148	0.4207	0.3905	0.4024
B186	810.425	0.385009	0.0500221	0.3152	0.384	0.4185	0.3104	0.4251	0.3247	0.4114	0.3154	0.4672	0.3519	0.3846	0.4442	0.3549	0.4363	0.4144	0.4078	0.3506	0.3584	0.4094	0.3435	0.4179	0.3756	0.3137	0.3409	0.3554	0.4496	0.4003	0.3807	0.342	0.3308	0.3585	0.3022	0.4389	0.4348	0.4133	0.4284	0.3137	0.3632	0.3272	0.402	0.4424	0.4341	0.4151	0.4188	0.3904	0.404
B187	812.646	0.386619	0.0496383	0.3147	0.3883	0.4161	0.3122	0.427	0.3303	0.4081	0.3169	0.4724	0.3534	0.3879	0.4449	0.3575	0.4365	0.4151	0.409	0.3522	0.3579	0.4115	0.3459	0.4177	0.3751	0.3129	0.3454	0.354	0.4506	0.4038	0.3855	0.3443	0.3316	0.36	0.3036	0.4394	0.4375	0.4164	0.4307	0.3163	0.3643	0.3305	0.4058	0.4424	0.4324	0.4146	0.4181	0.3922	0.4038
B188	814.867	0.3877	0.049082	0.3188	0.39	0.412	0.3152	0.4274	0.3324	0.4081	0.3158	0.4726	0.3545	0.3886	0.4466	0.3611	0.4364	0.4137	0.413	0.3531	0.3585	0.414	0.3476	0.4165	0.3763	0.3138	0.3477	0.3548	0.4521	0.4054	0.3871	0.3469	0.3339	0.362	0.3029	0.4385	0.4377	0.4221	0.4319	0.3151	0.3651	0.3312	0.409	0.4425	0.4293	0.4126	0.4208	0.3922	0.4028
B189	817.088	0.389501	0.0486609	0.3189	0.3927	0.414	0.3165	0.4272	0.3333	0.4089	0.3171	0.4709	0.3552	0.3907	0.4477	0.3622	0.4371	0.4166	0.4127	0.3586	0.3586	0.4119	0.3472	0.417	0.3793	0.3184	0.3495	0.3568	0.4567	0.4069	0.3857	0.3497	0.3392	0.3624	0.3048	0.4418	0.4376	0.4261	0.4317	0.3169	0.3683	0.335	0.412	0.4432	0.4313	0.4127	0.4225	0.3929	0.4065
B190	819.309	0.390873	0.048428	0.3186	0.3931	0.4157	0.3179	0.4271	0.3345	0.4103	0.3194	0.4692	0.3574	0.3898	0.4503	0.365	0.4367	0.4178	0.4127	0.3588	0.3608	0.412	0.3509	0.4154	0.382	0.3209	0.3481	0.3589	0.4597	0.4061	0.3881	0.3521	0.3426	0.3625	0.3076	0.4447	0.4378	0.4294	0.4385	0.3162	0.3679	0.3356	0.4139	0.4446	0.4333	0.4132	0.4237	0.3926	0.4053
B191	821.53	0.392156	0.0480637	0.3189	0.39	0.4152	0.3192	0.4255	0.3352	0.4132	0.3189	0.4671	0.3617	0.3896	0.4507	0.3673	0.4355	0.4191	0.4098	0.3608	0.363	0.4138	0.352	0.4181	0.3856	0.3224	0.3483	0.3619	0.4608	0.408	0.3914	0.3517	0.347	0.3621	0.3095	0.4457	0.4403	0.4312	0.4413	0.3177	0.3715	0.3372	0.4144	0.4487	0.4348	0.4134	0.4232	0.3939	0.4095
B192	823.751	0.393401	0.0483299	0.32	0.3899	0.4162	0.323	0.4303	0.339	0.4168	0.32	0.4658	0.3616	0.3895	0.4491	0.3677	0.4357	0.4245	0.4133	0.3624	0.3634	0.4127	0.3529	0.4201	0.3902	0.3208	0.3471	0.3611	0.4598	0.4075	0.3929	0.3529	0.3484	0.3633	0.3091	0.4479	0.4394	0.4294	0.4412	0.3218	0.3734	0.3373	0.4161	0.45	0.4389	0.416	0.428	0.3927	0.4093
B193	825.972	0.394691	0.0484135	0.3212	0.3924	0.4173	0.3261	0.4307	0.3395	0.4206	0.3238	0.4663	0.3648	0.3905	0.4478	0.3683	0.4383	0.4266	0.4128	0.3634	0.365	0.4153	0.3546	0.4201	0.394	0.3226	0.3461	0.3628	0.4573	0.4102	0.3956	0.3534	0.3509	0.3643	0.3106	0.446	0.4391	0.4295	0.4396	0.3224	0.3776	0.3374	0.4147	0.4551	0.4406	0.4196	0.4296	0.3916	0.4077
B194	828.193	0.395347	0.0487995	0.321	0.3921	0.4172	0.3291	0.4335	0.3403	0.4236	0.324	0.4651	0.3675	0.3918	0.4487	0.369	0.4425	0.4274	0.4168	0.3641	0.365	0.4142	0.3541	0.4251	0.3919	0.324	0.3465	0.3648	0.4583	0.4073	0.3952	0.3528	0.3487	0.3652	0.3081	0.4487	0.4407	0.4293	0.433	0.3236	0.3823	0.337	0.4133	0.4566	0.4477	0.421	0.4311	0.3929	0.4085
B195	830.414	0.396799	0.0488767	0.3238	0.3941	0.4192	0.3315	0.4355	0.3428	0.4263	0.3259	0.4676	0.3695	0.3911	0.4495	0.3748	0.4435	0.4289	0.4183	0.3657	0.3659	0.4154	0.356	0.4248	0.3947	0.3263	0.3472	0.3668	0.4584	0.4096	0.395	0.3533	0.3497	0.367	0.308	0.4486	0.4444	0.4319	0.4289	0.3264	0.3824	0.3376	0.4129	0.4569	0.4536	0.4253	0.4306	0.3915	0.4131
B196	832.635	0.397613	0.0485399	0.3267	0.3954	0.4211	0.3323	0.4374	0.3448	0.4279	0.3286	0.4712	0.369	0.3916	0.4505	0.3764	0.4485	0.4293	0.4179	0.366	0.368	0.4169	0.3555	0.4264	0.3962	0.3267	0.3512	0.3643	0.4579	0.4125	0.3951	0.3541	0.3498	0.3672	0.3093	0.4467	0.4466	0.4313	0.43	0.329	0.3845	0.3397	0.4125	0.456	0.4557	0.4279	0.4289	0.3903	0.4125
B197	834.856	0.39893	0.0486503	0.3304	0.3961	0.4211	0.3335	0.438	0.3478	0.429	0.3339	0.4743	0.3687	0.3923	0.4526	0.3766	0.4526	0.434	0.4213	0.3671	0.368	0.419	0.3535	0.4268	0.3957	0.3275	0.3528	0.3635	0.4617	0.4142	0.3956	0.3559	0.3479	0.3663	0.3109	0.4489	0.45	0.4341	0.4302	0.3311	0.3847	0.3421	0.4148	0.4564	0.4539	0.431	0.4298	0.3926	0.4155
B198	837.077	0.399346	0.0489204	0.3318	0.3975	0.4212	0.3341	0.441	0.3473	0.4302	0.3339	0.4743	0.3691	0.3904	0.4512	0.3757	0.4566	0.4341	0.4218	0.3695	0.3703	0.4204	0.3525	0.427	0.3933	0.327	0.3509	0.3636	0.4652	0.4146	0.3911	0.3587	0.3466	0.3688	0.3103	0.4482	0.4516	0.4378	0.433	0.3297	0.3867	0.3416	0.4162	0.4527	0.4517	0.4327	0.4322	0.3954	0.4155
B199	839.299	0.399713	0.0487536	0.3327	0.398	0.4236	0.3315	0.4435	0.3483	0.4316	0.3349	0.4769	0.3683	0.3902	0.4542	0.3745	0.458	0.4378	0.4189	0.3708	0.3712	0.4172	0.3503	0.4243	0.3912	0.3302	0.3489	0.367	0.4662	0.4131	0.3854	0.359	0.3498	0.3683	0.3138	0.4513	0.4532	0.4379	0.436	0.3321	0.3853	0.3425	0.4165	0.4502	0.451	0.4316	0.4335	0.3944	0.4158
B200	841.52	0.39974	0.0482128	0.334	0.3984	0.4205	0.3308	0.4408	0.3503	0.4305	0.3337	0.4784	0.3689	0.3906	0.4564	0.3738	0.4547	0.4396	0.4179	0.3704	0.3693	0.4148	0.3506	0.4222	0.3897	0.3295	0.3514	0.3674	0.4648	0.4114	0.3867	0.3608	0.3507	0.3738	0.3163	0.4501	0.4555	0.4408	0.4408	0.331	0.3806	0.3438	0.4182	0.452	0.4488	0.4304	0.4308	0.3943	0.4167
B201	843.741	0.400423	0.0479716	0.3348	0.3974	0.4189	0.3303	0.4392	0.3483	0.433	0.3305	0.4801	0.3717	0.3959	0.4588	0.3735	0.454	0.441	0.4169	0.3714	0.3698	0.4162	0.3518	0.4231	0.3913	0.3286	0.3553	0.3729	0.4682	0.4142	0.3906	0.3613	0.3533	0.3775	0.3167	0.449	0.4563	0.4428	0.4435	0.3301	0.3812	0.3468	0.4177	0.4536	0.4462	0.4265	0.4315	0.3927	0.4209
B202	845.962	0.401243	0.0479092	0.3358	0.3984	0.4195	0.3316	0.4412	0.3516	0.4342	0.332	0.4804	0.3711	0.3986	0.4594	0.3742	0.4539	0.4423	0.4179	0.3717	0.3695	0.4151	0.357	0.4234	0.3946	0.327	0.3559	0.3738	0.4692	0.4151	0.3932	0.3637	0.3569	0.3832	0.3168	0.451	0.4544	0.4413	0.4452	0.3286	0.382	0.3469	0.418	0.4528	0.4451	0.426	0.4341	0.3958	0.4233
B203	848.183	0.402287	0.0472097	0.3346	0.4015	0.4197	0.3329	0.4394	0.3544	0.4348	0.332	0.4795	0.376	0.4023	0.4615	0.3751	0.4536	0.4394	0.42	0.3734	0.3719	0.4183	0.3608	0.4198	0.399	0.3324	0.3563	0.3778	0.4698	0.4179	0.3974	0.3686	0.3581	0.3868	0.3174	0.4487	0.4519	0.4405	0.4449	0.3278	0.382	0.3472	0.4148	0.455	0.4445	0.4257	0.4341	0.3972	0.4238
B204	850.404	0.402976	0.0467507	0.3339	0.4018	0.4204	0.3342	0.4393	0.3549	0.4351	0.3314	0.4764	0.3753	0.4048	0.4641	0.3795	0.4526	0.4373	0.4252	0.3754	0.3746	0.4171	0.3633	0.4212	0.4021	0.3345	0.355	0.3773	0.4699	0.4154	0.3999	0.3706	0.3594	0.3886	0.3182	0.4517	0.4516	0.4428	0.4456	0.3292	0.3842	0.3477	0.4137	0.453	0.4462	0.4254	0.435	0.3997	0.4229
B205	852.625	0.403977	0.0464066	0.3352	0.402	0.4211	0.3347	0.4414	0.3548	0.4366	0.3353	0.4783	0.3745	0.4034	0.4654	0.3812	0.4472	0.4383	0.4282	0.3769	0.3785	0.4181	0.3667	0.4194	0.4062	0.3376	0.3553	0.3752	0.4714	0.4171	0.4042	0.3731	0.3633	0.3899	0.3204	0.4539	0.4539	0.4414	0.4425	0.3308	0.3801	0.3491	0.4122	0.4534	0.445	0.4267	0.4334	0.402	0.4212
B206	854.846	0.40479	0.0461455	0.334	0.4032	0.4233	0.3385	0.4408	0.3528	0.4365	0.3377	0.4805	0.3741	0.4063	0.4668	0.3803	0.4474	0.4355	0.4317	0.3772	0.3842	0.4224	0.3651	0.4228	0.4099	0.3416	0.3571	0.3728	0.4725	0.4182	0.4046	0.3735	0.3638	0.3889	0.3208	0.4532	0.4528	0.4401	0.4409	0.3297	0.3813	0.3467	0.4138	0.4547	0.4435	0.4276	0.4343	0.4042	0.42
B207	857.067	0.40571	0.0464497	0.3338	0.4041	0.4247	0.3393	0.4418	0.3543	0.4356	0.3388	0.4796	0.3721	0.4048	0.4669	0.3806	0.4482	0.4381	0.4358	0.381	0.3885	0.4253	0.3665	0.4236	0.4131	0.342	0.3582	0.3739	0.4711	0.4179	0.4042	0.3731	0.3627	0.3858	0.3197	0.4563	0.4498	0.4375	0.4396	0.3315	0.381	0.3456	0.4167	0.4564	0.4418	0.4291	0.4353	0.4045	0.4224
B208	859.288	0.406071	0.0469709	0.3338	0.406	0.4286	0.3392	0.447	0.3548	0.4372	0.34	0.4802	0.3727	0.3998	0.4654	0.3812	0.4475	0.438	0.4349	0.3815	0.3911	0.4268	0.3668	0.4265	0.4117	0.338	0.3587	0.3732	0.4723	0.4143	0.4005	0.3749	0.363	0.3846	0.3212	0.4559	0.4482	0.4353	0.4408	0.3319	0.3821	0.3464	0.42	0.4565	0.4406	0.4311	0.4356	0.4075	0.418
B209	861.509	0.405994	0.0465489	0.3345	0.403	0.4265	0.34	0.4498	0.3556	0.4383	0.3411	0.4821	0.3743	0.3976	0.4662	0.3788	0.4459	0.4381	0.4341	0.3831	0.3887	0.4272	0.3647	0.4267	0.409	0.3378	0.36	0.3731	0.4715	0.4118	0.3982	0.3733	0.3665	0.3843	0.3249	0.4566	0.4482	0.4348	0.439	0.3329	0.3816	0.3462	0.4208	0.4573	0.4408	0.426	0.4348	0.4047	0.4181
B210	863.73	0.405746	0.0463156	0.3338	0.402	0.4239	0.3434	0.446	0.3552	0.4346	0.3416	0.4831	0.376	0.3961	0.4665	0.3762	0.4396	0.4384	0.4361	0.3804	0.3838	0.4298	0.3625	0.4241	0.4077	0.3372	0.365	0.3724	0.4714	0.4109	0.3984	0.3739	0.3663	0.3854	0.3245	0.4573	0.447	0.4351	0.4399	0.3323	0.3835	0.3474	0.4224	0.4607	0.4399	0.425	0.4308	0.4045	0.4203
B211	865.952	0.4065	0.0461101	0.3342	0.4009	0.421	0.3447	0.4468	0.3518	0.4333	0.3425	0.4858	0.3791	0.3978	0.4656	0.3775	0.445	0.4401	0.4352	0.3811	0.3804	0.4315	0.3672	0.4268	0.407	0.3355	0.3674	0.3741	0.4731	0.4163	0.4005	0.3751	0.3691	0.384	0.3265	0.4587	0.4461	0.4359	0.4404	0.335	0.3876	0.3522	0.4225	0.4591	0.4394	0.4238	0.4325	0.401	0.4243
B212	868.173	0.407483	0.0459927	0.3342	0.3998	0.4186	0.3459	0.4499	0.3561	0.4321	0.344	0.4877	0.3791	0.3981	0.4656	0.3784	0.4468	0.4427	0.4306	0.3815	0.3779	0.4312	0.372	0.4272	0.4093	0.3341	0.3686	0.3748	0.4733	0.4175	0.401	0.3777	0.3709	0.3866	0.325	0.46	0.4472	0.4379	0.4418	0.3372	0.391	0.353	0.4237	0.4559	0.4405	0.425	0.4343	0.3999	0.4286
B213	870.394	0.410041	0.0456167	0.3361	0.4034	0.4218	0.3463	0.4516	0.3591	0.4344	0.346	0.4888	0.384	0.4037	0.468	0.3823	0.4502	0.4463	0.4341	0.3855	0.3789	0.4318	0.3737	0.4254	0.4156	0.3382	0.3683	0.3761	0.4746	0.4225	0.4019	0.3819	0.3742	0.3887	0.3266	0.4611	0.4508	0.442	0.4469	0.3434	0.3915	0.3561	0.4233	0.457	0.4449	0.4314	0.4355	0.4013	0.433
B214	872.615	0.411124	0.0452621	0.3404	0.4057	0.4246	0.3473	0.4542	0.3614	0.4348	0.3452	0.4867	0.3835	0.4077	0.4686	0.3853	0.4491	0.4493	0.4335	0.3855	0.3809	0.4322	0.3739	0.4261	0.4193	0.3399	0.3632	0.3742	0.4758	0.4245	0.4046	0.3848	0.3748	0.3882	0.3285	0.4649	0.4524	0.4432	0.4487	0.345	0.3962	0.3579	0.4232	0.4556	0.4458	0.4345	0.4367	0.4017	0.4354
B215	874.836	0.412973	0.0451515	0.3453	0.4098	0.4275	0.345	0.4583	0.3656	0.4387	0.3486	0.4891	0.3859	0.4114	0.4678	0.3856	0.4498	0.4564	0.4337	0.3867	0.3853	0.4331	0.3736	0.4287	0.4231	0.3436	0.3635	0.3731	0.4797	0.428	0.4096	0.386	0.3756	0.3895	0.3291	0.4665	0.4536	0.4451	0.4512	0.3478	0.3957	0.3605	0.4256	0.4581	0.449	0.4372	0.4382	0.4043	0.4361
B216	877.057	0.41561	0.045567	0.3509	0.4175	0.4298	0.3502	0.4612	0.3711	0.4402	0.3494	0.493	0.3863	0.4182	0.4719	0.3887	0.4532	0.4579	0.4325	0.385	0.3883	0.4343	0.373	0.4353	0.4295	0.3474	0.3647	0.3766	0.4809	0.4325	0.4085	0.3887	0.3753	0.3907	0.3274	0.4678	0.4559	0.449	0.4528	0.3452	0.3985	0.3598	0.4286	0.4646	0.4512	0.4412	0.4426	0.4082	0.4383
B217	879.278	0.418131	0.0457317	0.3592	0.425	0.4331	0.3537	0.465	0.3746	0.4423	0.3487	0.4945	0.3861	0.4212	0.4731	0.3921	0.4588	0.4621	0.433	0.3887	0.3934	0.4343	0.379	0.4397	0.4323	0.3497	0.3691	0.3788	0.4793	0.433	0.4105	0.3894	0.3757	0.3939	0.3296	0.4685	0.4568	0.4514	0.4567	0.346	0.3997	0.3615	0.4311	0.4731	0.4558	0.4456	0.4413	0.4107	0.4371
B218	881.499	0.419567	0.0460197	0.3633	0.4269	0.4376	0.3543	0.4643	0.3768	0.4497	0.3524	0.4947	0.3859	0.423	0.4732	0.3946	0.4591	0.4603	0.4333	0.3883	0.3945	0.4327	0.3812	0.4448	0.4331	0.3479	0.3717	0.3802	0.4825	0.432	0.4105	0.3927	0.3753	0.3941	0.3351	0.4661	0.4584	0.458	0.4602	0.348	0.3995	0.362	0.4329	0.479	0.458	0.4467	0.4401	0.4141	0.4325
B219	883.72	0.420621	0.0456418	0.3648	0.4263	0.4377	0.3574	0.4619	0.3787	0.4505	0.3537	0.4926	0.3848	0.4239	0.474	0.3956	0.4622	0.4565	0.4344	0.3942	0.3949	0.4331	0.3836	0.4478	0.4295	0.3508	0.3743	0.3803	0.483	0.4336	0.4093	0.389	0.38	0.3975	0.3341	0.4641	0.4619	0.4612	0.4586	0.3462	0.3983	0.3623	0.433	0.4859	0.461	0.4413	0.4421	0.4141	0.432
B220	885.941	0.4218	0.0461161	0.3675	0.4239	0.4391	0.3619	0.461	0.3778	0.4523	0.3537	0.4949	0.3839	0.424	0.4763	0.3973	0.4604	0.4546	0.4372	0.3926	0.3958	0.4317	0.3832	0.446	0.4274	0.3524	0.3787	0.3821	0.4875	0.4338	0.4127	0.3901	0.3826	0.4004	0.3347	0.4663	0.4627	0.4636	0.4655	0.3458	0.4014	0.3633	0.4341	0.4888	0.4598	0.4406	0.4433	0.4154	0.4327
B221	888.162	0.423344	0.0458567	0.369	0.4213	0.439	0.3634	0.4636	0.3791	0.458	0.3562	0.495	0.3849	0.425	0.478	0.3995	0.4667	0.4557	0.4364	0.395	0.3968	0.4306	0.3863	0.451	0.4227	0.3549	0.38	0.3857	0.4872	0.4388	0.4181	0.3944	0.3885	0.4028	0.3369	0.4664	0.4657	0.4687	0.4661	0.3507	0.4054	0.3664	0.4343	0.488	0.4599	0.4397	0.4476	0.4146	0.4358
B222	890.383	0.423919	0.0456569	0.3645	0.4202	0.439	0.3646	0.4646	0.3808	0.4612	0.361	0.4954	0.3829	0.4269	0.4775	0.3971	0.4647	0.457	0.4376	0.4009	0.3989	0.4329	0.3886	0.4471	0.4206	0.3569	0.3826	0.388	0.4873	0.4363	0.4197	0.3973	0.3902	0.4062	0.3358	0.4648	0.4675	0.468	0.4676	0.3517	0.4022	0.3644	0.4346	0.4846	0.4623	0.4396	0.4487	0.4151	0.4367
B223	892.604	0.425726	0.0446054	0.3665	0.424	0.4439	0.366	0.4677	0.3808	0.4653	0.3672	0.4956	0.3853	0.4306	0.4781	0.398	0.4675	0.4586	0.4448	0.4051	0.4023	0.4354	0.389	0.444	0.4235	0.3625	0.3852	0.3903	0.4896	0.4402	0.4226	0.3965	0.3968	0.4096	0.3397	0.4661	0.4708	0.4676	0.4674	0.3577	0.4016	0.3684	0.4343	0.4835	0.4607	0.441	0.4502	0.4172	0.4413
B224	894.826	0.425907	0.0435015	0.3693	0.4202	0.4433	0.3672	0.4703	0.38	0.4637	0.366	0.4937	0.3884	0.4303	0.4767	0.3941	0.4664	0.4628	0.4469	0.4039	0.4001	0.4415	0.3901	0.442	0.4237	0.3669	0.384	0.3921	0.4875	0.4393	0.4253	0.3989	0.3969	0.4113	0.3445	0.4658	0.4682	0.4642	0.4645	0.3566	0.4036	0.3694	0.4334	0.4789	0.4608	0.4404	0.4515	0.4139	0.4454
B225	897.047	0.426531	0.0419196	0.3688	0.4221	0.4439	0.3692	0.4735	0.3841	0.4677	0.367	0.4951	0.3896	0.43	0.4777	0.3939	0.4675	0.4647	0.4509	0.406	0.3981	0.4439	0.3916	0.4427	0.4258	0.3718	0.3842	0.3952	0.4854	0.4391	0.4286	0.4004	0.397	0.4163	0.3491	0.4668	0.4666	0.4612	0.4634	0.3586	0.4035	0.3747	0.4324	0.474	0.4546	0.4419	0.4525	0.4134	0.4476
B226	899.268	0.427033	0.0410389	0.3702	0.4268	0.4436	0.3723	0.472	0.3839	0.4634	0.3674	0.4946	0.3909	0.4282	0.4801	0.3931	0.4668	0.464	0.4505	0.4057	0.3975	0.447	0.3919	0.4421	0.4301	0.3713	0.3867	0.3983	0.4832	0.4398	0.4303	0.4045	0.398	0.4171	0.3503	0.4661	0.4687	0.4563	0.4601	0.3591	0.4046	0.3762	0.4331	0.4755	0.4516	0.4451	0.4514	0.4117	0.4476
B227	901.489	0.428273	0.0395036	0.3724	0.428	0.444	0.3762	0.4711	0.3846	0.4599	0.3663	0.4946	0.3966	0.4296	0.4767	0.3938	0.4692	0.4666	0.4514	0.4103	0.4015	0.4515	0.3988	0.4431	0.4355	0.3764	0.3917	0.4	0.4794	0.4387	0.4319	0.4055	0.4008	0.4183	0.3576	0.4661	0.4723	0.4566	0.458	0.3654	0.4048	0.379	0.434	0.4811	0.451	0.4473	0.4462	0.4126	0.4472
B228	903.71	0.42858	0.0389371	0.3697	0.4271	0.4407	0.3761	0.4705	0.384	0.4572	0.3681	0.4918	0.4009	0.429	0.4766	0.3989	0.4697	0.464	0.4514	0.4111	0.4042	0.4521	0.401	0.4447	0.438	0.3746	0.3929	0.4002	0.4801	0.4374	0.4285	0.4055	0.4004	0.415	0.36	0.4665	0.4713	0.4579	0.4592	0.3677	0.4053	0.3794	0.4321	0.4813	0.45	0.4471	0.4479	0.4125	0.448
B229	905.931	0.43013	0.0381906	0.3713	0.4283	0.4407	0.3814	0.4685	0.3877	0.4523	0.3691	0.4911	0.4048	0.4305	0.4792	0.4057	0.4722	0.4627	0.4514	0.4147	0.4062	0.4506	0.4061	0.4478	0.4371	0.3792	0.3923	0.4012	0.4812	0.4407	0.4239	0.401	0.4081	0.415	0.3605	0.4702	0.4737	0.458	0.4575	0.3688	0.4075	0.3806	0.4331	0.4872	0.4484	0.4471	0.4484	0.4174	0.4479
B230	908.152	0.431381	0.0380316	0.3783	0.4319	0.4418	0.3838	0.4683	0.3903	0.4538	0.3686	0.4935	0.4092	0.4301	0.481	0.4096	0.4725	0.4626	0.4492	0.4129	0.4085	0.4475	0.4066	0.4495	0.4384	0.3796	0.3942	0.4055	0.4875	0.4395	0.4247	0.4017	0.4129	0.4144	0.3623	0.4723	0.4677	0.4573	0.4623	0.3722	0.413	0.3807	0.4331	0.4884	0.4462	0.4482	0.448	0.4164	0.4493
B231	910.373	0.434049	0.0374115	0.3824	0.4388	0.4454	0.3869	0.4675	0.3949	0.458	0.3755	0.4925	0.4107	0.4312	0.4832	0.4158	0.475	0.4654	0.4464	0.4158	0.4123	0.4501	0.4088	0.4551	0.4372	0.3854	0.3934	0.4092	0.4881	0.4426	0.4279	0.4047	0.4224	0.4101	0.3675	0.4742	0.4663	0.4633	0.4635	0.3788	0.4167	0.3825	0.4335	0.4897	0.4533	0.4496	0.4495	0.4214	0.4518
B232	912.594	0.435121	0.0370295	0.3823	0.4436	0.4455	0.3874	0.4669	0.3952	0.458	0.3815	0.4908	0.4096	0.4309	0.4824	0.4193	0.4722	0.4653	0.4505	0.415	0.4167	0.4502	0.4105	0.4563	0.4386	0.3887	0.397	0.4086	0.4873	0.4426	0.423	0.4074	0.4242	0.4111	0.3694	0.4745	0.4634	0.4644	0.4648	0.3805	0.4159	0.3795	0.4351	0.4886	0.4551	0.4512	0.4478	0.4224	0.4528
B233	914.815	0.437696	0.0369171	0.3883	0.4477	0.4506	0.3903	0.4676	0.3978	0.4613	0.389	0.4936	0.4108	0.4337	0.4848	0.4229	0.4734	0.466	0.4556	0.4115	0.4194	0.4487	0.4117	0.4608	0.4422	0.3931	0.398	0.4084	0.4914	0.4484	0.4248	0.4075	0.4273	0.4103	0.3732	0.4783	0.465	0.4708	0.4653	0.3833	0.4199	0.3848	0.4354	0.4879	0.4559	0.4492	0.4504	0.4261	0.4533
B234	917.036	0.437816	0.0371214	0.391	0.4454	0.4501	0.3903	0.4675	0.3983	0.4646	0.3886	0.4967	0.4091	0.4339	0.4848	0.4239	0.4681	0.4682	0.4564	0.4076	0.4171	0.4501	0.4158	0.4613	0.4381	0.3916	0.3898	0.4071	0.4903	0.4477	0.4244	0.4118	0.4231	0.4117	0.3747	0.4797	0.463	0.4709	0.4653	0.3798	0.4235	0.3856	0.4404	0.4828	0.4587	0.4487	0.451	0.4241	0.4544
B235	919.257	0.438819	0.0367506	0.3876	0.4463	0.4513	0.3914	0.4665	0.4036	0.4737	0.3891	0.502	0.4053	0.4369	0.4891	0.4253	0.4623	0.4654	0.4584	0.4121	0.4171	0.4486	0.4185	0.4598	0.4388	0.3875	0.3893	0.4074	0.4915	0.4511	0.4284	0.4162	0.42	0.4182	0.3752	0.4834	0.466	0.4699	0.4651	0.381	0.427	0.3917	0.4436	0.4799	0.4544	0.45	0.4504	0.4272	0.4533
B236	921.479	0.438891	0.0369125	0.3886	0.4449	0.4518	0.3899	0.4651	0.3988	0.4754	0.3916	0.504	0.4053	0.4369	0.4859	0.426	0.4583	0.4676	0.4584	0.4116	0.4183	0.4527	0.4223	0.4566	0.4375	0.3805	0.3905	0.4051	0.4913	0.4514	0.4334	0.4199	0.4158	0.4199	0.3731	0.4813	0.471	0.471	0.4669	0.3815	0.4282	0.3898	0.4462	0.4801	0.4548	0.4505	0.449	0.4249	0.4538
B237	923.7	0.441256	0.0361245	0.3913	0.4448	0.4529	0.3929	0.4687	0.4038	0.4789	0.3938	0.5067	0.4128	0.4442	0.4845	0.4221	0.4609	0.4683	0.4618	0.419	0.4261	0.455	0.4214	0.4583	0.4379	0.3822	0.3937	0.4068	0.4929	0.4534	0.4377	0.4218	0.417	0.4244	0.377	0.4841	0.4776	0.472	0.465	0.3857	0.4295	0.3924	0.451	0.4858	0.4587	0.4533	0.4529	0.4276	0.4578
B238	925.921	0.44459	0.0354803	0.3937	0.4452	0.4504	0.3987	0.4725	0.4064	0.482	0.3976	0.5105	0.4206	0.4475	0.4867	0.4221	0.4651	0.4675	0.4651	0.4262	0.4288	0.4545	0.4207	0.4623	0.439	0.3834	0.4005	0.4094	0.494	0.4552	0.4365	0.4278	0.4177	0.4325	0.3812	0.4847	0.4807	0.4717	0.471	0.3911	0.4393	0.3952	0.4555	0.4875	0.4666	0.4595	0.4635	0.4298	0.4623
B239	928.142	0.451707	0.0332381	0.4075	0.4526	0.4566	0.4097	0.4754	0.4165	0.4868	0.405	0.5157	0.4293	0.4566	0.4916	0.4265	0.4737	0.471	0.4684	0.4366	0.4336	0.4569	0.4257	0.4659	0.4453	0.3972	0.4123	0.4214	0.4973	0.4641	0.4438	0.4324	0.4273	0.4435	0.3916	0.488	0.487	0.4769	0.476	0.3994	0.4443	0.406	0.4641	0.4945	0.4725	0.4696	0.4736	0.4415	0.4672
B240	930.363	0.458141	0.0311427	0.4187	0.4603	0.4628	0.4191	0.4791	0.4217	0.4928	0.414	0.5187	0.4392	0.4639	0.495	0.4289	0.4851	0.4777	0.4719	0.4509	0.4402	0.4653	0.4287	0.4674	0.4523	0.4041	0.4266	0.4316	0.5008	0.468	0.4518	0.438	0.4326	0.4538	0.3988	0.4921	0.4858	0.4808	0.481	0.4108	0.4522	0.4174	0.4675	0.4954	0.481	0.4746	0.4781	0.4468	0.4763
B241	932.584	0.465929	0.0288185	0.4296	0.4631	0.4681	0.4312	0.486	0.4307	0.4947	0.4242	0.5176	0.4472	0.4703	0.4971	0.4382	0.494	0.487	0.4782	0.463	0.4485	0.4774	0.4339	0.4747	0.4599	0.4183	0.4379	0.439	0.5044	0.4752	0.4613	0.4478	0.4459	0.4626	0.4115	0.499	0.49	0.4879	0.4849	0.4215	0.459	0.4308	0.4736	0.5002	0.4909	0.4823	0.4822	0.4527	0.4833
B242	934.805	0.470494	0.0273803	0.4349	0.4633	0.4722	0.4398	0.4929	0.4357	0.4936	0.428	0.5072	0.4525	0.4711	0.5023	0.4447	0.5009	0.4875	0.4853	0.464	0.4544	0.4847	0.4374	0.4783	0.4686	0.4274	0.4494	0.4433	0.5092	0.4803	0.467	0.4554	0.4468	0.4688	0.4208	0.5057	0.4894	0.4933	0.4865	0.4284	0.4615	0.4387	0.4768	0.5006	0.4909	0.4864	0.4856	0.4576	0.4923
B243	937.026	0.475231	0.0266032	0.4395	0.4643	0.4808	0.4451	0.4978	0.4454	0.4943	0.4353	0.5047	0.4557	0.4755	0.5067	0.4522	0.5063	0.4888	0.4864	0.4688	0.4567	0.4884	0.4424	0.4862	0.4774	0.4343	0.4566	0.45	0.5157	0.4848	0.4748	0.4627	0.4497	0.4723	0.4253	0.5104	0.4927	0.4977	0.4866	0.4361	0.4641	0.4483	0.4796	0.5027	0.4939	0.487	0.4878	0.4652	0.4951
B244	939.247	0.476431	0.0258315	0.4404	0.4618	0.4836	0.447	0.5001	0.4491	0.4979	0.4375	0.5041	0.4523	0.4733	0.5126	0.4615	0.5037	0.4919	0.4868	0.4688	0.4603	0.4902	0.4492	0.4851	0.479	0.4341	0.4571	0.4563	0.5175	0.4854	0.4768	0.4676	0.4495	0.4749	0.4288	0.5161	0.4902	0.4969	0.4867	0.4413	0.4635	0.4499	0.4816	0.5001	0.4922	0.4873	0.4855	0.4651	0.4959
B245	941.468	0.478059	0.0253614	0.4346	0.4574	0.4861	0.4482	0.4981	0.4539	0.4977	0.4429	0.5051	0.4472	0.4744	0.5157	0.4706	0.4998	0.4921	0.4883	0.4718	0.4639	0.4924	0.4571	0.4879	0.482	0.4361	0.4594	0.4576	0.5193	0.4913	0.4801	0.4713	0.4556	0.4748	0.4358	0.5219	0.4896	0.498	0.4864	0.4449	0.4638	0.4526	0.4768	0.5009	0.4902	0.4881	0.4853	0.468	0.4979
B246	943.689	0.476446	0.0250862	0.4319	0.4553	0.4833	0.4472	0.4973	0.4521	0.4986	0.4413	0.5028	0.4486	0.4703	0.514	0.4749	0.4967	0.492	0.4874	0.4656	0.4638	0.4928	0.4646	0.4866	0.478	0.4324	0.4549	0.4529	0.5188	0.4812	0.4782	0.4739	0.4587	0.4695	0.4362	0.5157	0.4881	0.497	0.4867	0.4417	0.4635	0.448	0.4705	0.502	0.4875	0.484	0.4848	0.4656	0.4977
B247	945.91	0.476183	0.0242853	0.4348	0.4578	0.4839	0.4444	0.4968	0.4557	0.4968	0.4406	0.5043	0.449	0.4719	0.5146	0.4745	0.4969	0.4893	0.4847	0.4655	0.4686	0.4901	0.4623	0.4877	0.4741	0.4333	0.4509	0.4527	0.5149	0.4809	0.475	0.4669	0.4653	0.4649	0.4377	0.5148	0.4895	0.4943	0.4832	0.4421	0.4626	0.448	0.4705	0.5046	0.4895	0.4835	0.4841	0.4641	0.4957
B248	948.131	0.476489	0.0237279	0.4377	0.4634	0.4837	0.4469	0.4941	0.4567	0.4992	0.442	0.5118	0.4516	0.4709	0.5119	0.4737	0.4966	0.4832	0.4824	0.4675	0.4642	0.4865	0.4646	0.49	0.4704	0.4366	0.4505	0.4497	0.5099	0.4763	0.4691	0.4699	0.4697	0.467	0.439	0.5119	0.492	0.4936	0.489	0.4439	0.4653	0.4456	0.4686	0.5061	0.4905	0.4837	0.4892	0.4623	0.493
B249	950.353	0.478646	0.0219721	0.4464	0.4759	0.4892	0.4482	0.4918	0.4609	0.5013	0.4468	0.5161	0.4552	0.4738	0.5126	0.4761	0.4953	0.4837	0.4822	0.4692	0.4644	0.4849	0.4688	0.4887	0.4705	0.4457	0.459	0.4519	0.5097	0.4766	0.4694	0.4677	0.4752	0.4687	0.4434	0.5102	0.4963	0.497	0.4918	0.4449	0.4662	0.4506	0.4724	0.5086	0.4916	0.4871	0.4938	0.4678	0.4929
B250	952.574	0.477806	0.0215607	0.4438	0.4792	0.4855	0.4489	0.4907	0.4544	0.505	0.4482	0.5188	0.4572	0.4761	0.5072	0.4714	0.492	0.4839	0.4806	0.469	0.462	0.4873	0.4689	0.4833	0.4654	0.4449	0.4615	0.4518	0.5048	0.4766	0.4642	0.4634	0.4713	0.4712	0.4373	0.5072	0.4925	0.4981	0.4915	0.4456	0.4683	0.4535	0.474	0.5074	0.4919	0.4853	0.4898	0.4707	0.4885
B251	954.795	0.478459	0.0209704	0.4487	0.4826	0.4851	0.4507	0.4962	0.4554	0.5038	0.4495	0.5206	0.4613	0.4826	0.5031	0.473	0.4914	0.4864	0.4821	0.4697	0.4595	0.4882	0.4722	0.4833	0.468	0.4512	0.4614	0.4517	0.5075	0.4769	0.465	0.4648	0.475	0.4715	0.4376	0.505	0.4946	0.4979	0.4897	0.4428	0.4705	0.455	0.4818	0.5099	0.4894	0.485	0.4865	0.4695	0.4857
B252	957.016	0.476886	0.0211234	0.4528	0.4884	0.4783	0.4528	0.4969	0.4532	0.5006	0.4468	0.5148	0.462	0.4799	0.5035	0.4705	0.4884	0.4835	0.4799	0.4671	0.4549	0.4873	0.4693	0.4759	0.471	0.4505	0.462	0.4495	0.5067	0.478	0.4677	0.4648	0.4663	0.4694	0.4392	0.5029	0.4967	0.4988	0.4909	0.441	0.4655	0.4507	0.4828	0.5061	0.4884	0.482	0.4864	0.4741	0.4862
B253	959.237	0.47729	0.0210209	0.4524	0.4884	0.4769	0.4547	0.496	0.4535	0.5004	0.4488	0.5167	0.4611	0.4816	0.5007	0.4686	0.4901	0.4896	0.4773	0.4684	0.4547	0.4865	0.4696	0.476	0.476	0.4505	0.4631	0.4547	0.5034	0.4816	0.4683	0.4665	0.4682	0.4689	0.4409	0.5018	0.5005	0.4976	0.4894	0.4434	0.4667	0.4491	0.4839	0.5097	0.4889	0.4808	0.4823	0.4762	0.4871
B254	961.458	0.475624	0.0213236	0.4523	0.4832	0.4729	0.4543	0.496	0.4483	0.5004	0.445	0.5209	0.4543	0.4817	0.5019	0.4658	0.4883	0.492	0.4773	0.4678	0.4563	0.4827	0.4638	0.4708	0.4784	0.4478	0.4616	0.4582	0.5025	0.4814	0.4698	0.4682	0.4646	0.4653	0.4434	0.5044	0.4991	0.4911	0.4906	0.4405	0.466	0.4458	0.4817	0.5066	0.4854	0.4795	0.4797	0.4742	0.4862
B255	963.679	0.474684	0.021532	0.446	0.48	0.4687	0.4522	0.4939	0.4474	0.4925	0.4448	0.5188	0.4509	0.4803	0.502	0.4642	0.4892	0.4931	0.4776	0.4681	0.4577	0.4857	0.4605	0.4746	0.4747	0.4455	0.4585	0.4558	0.502	0.4838	0.4716	0.4704	0.4683	0.4616	0.4451	0.504	0.5	0.4864	0.4896	0.4396	0.466	0.4498	0.4772	0.5066	0.4852	0.4754	0.4824	0.4732	0.4886
B256	965.9	0.47269	0.0218696	0.4417	0.4726	0.4676	0.4457	0.495	0.4448	0.4894	0.4387	0.5141	0.4521	0.4763	0.5033	0.4643	0.4901	0.4935	0.4781	0.4677	0.4582	0.4871	0.4575	0.4739	0.4753	0.4402	0.4516	0.4541	0.5007	0.4771	0.4699	0.4779	0.468	0.4578	0.4431	0.4974	0.4977	0.4812	0.487	0.4337	0.4635	0.4515	0.4772	0.5044	0.4854	0.4686	0.4799	0.4725	0.4858
B257	968.121	0.472971	0.0218824	0.4403	0.47	0.4733	0.445	0.4954	0.4449	0.4831	0.4381	0.5142	0.4504	0.4772	0.5054	0.466	0.4918	0.4892	0.4779	0.469	0.4628	0.4919	0.4522	0.4743	0.4739	0.4409	0.4448	0.4545	0.5	0.479	0.4709	0.4738	0.4717	0.4574	0.4418	0.4994	0.4958	0.4786	0.4838	0.436	0.4658	0.4567	0.4771	0.5019	0.4846	0.4661	0.4802	0.4715	0.4886
B258	970.342	0.472799	0.0221177	0.4373	0.4677	0.4788	0.4453	0.495	0.4461	0.4805	0.4348	0.5148	0.4532	0.4762	0.5053	0.4642	0.492	0.4841	0.479	0.4721	0.4652	0.4925	0.4523	0.4752	0.4717	0.4416	0.4434	0.4528	0.4992	0.4733	0.4708	0.4748	0.47	0.4623	0.4372	0.4961	0.4943	0.4764	0.488	0.4394	0.4629	0.4579	0.475	0.4998	0.4833	0.468	0.4844	0.4707	0.4875
B259	972.563	0.474706	0.021261	0.439	0.4691	0.4886	0.449	0.4912	0.4487	0.4817	0.4383	0.5112	0.4575	0.4746	0.5049	0.467	0.4895	0.4838	0.484	0.4693	0.4673	0.4925	0.4549	0.4774	0.4736	0.4454	0.4478	0.4587	0.5014	0.474	0.4702	0.4721	0.4732	0.4634	0.4375	0.497	0.4905	0.4792	0.4884	0.4416	0.4666	0.4594	0.4775	0.5034	0.4862	0.4723	0.4878	0.4736	0.4906
B260	974.784	0.475153	0.0215447	0.4369	0.4678	0.4887	0.4513	0.4951	0.4454	0.4848	0.4381	0.5096	0.4542	0.4765	0.503	0.4637	0.4885	0.4834	0.4847	0.4726	0.4662	0.4948	0.456	0.4759	0.4701	0.4475	0.4486	0.4645	0.502	0.4769	0.465	0.4704	0.4687	0.4666	0.4328	0.4969	0.4838	0.4815	0.4851	0.4455	0.4686	0.4591	0.4792	0.5002	0.4864	0.4735	0.4916	0.4735	0.4886
B261	977.006	0.478191	0.0209951	0.4449	0.4699	0.4913	0.4546	0.495	0.4509	0.485	0.4434	0.5104	0.4601	0.4812	0.5046	0.4692	0.4963	0.4897	0.4902	0.4817	0.4706	0.4945	0.4651	0.4795	0.4736	0.4512	0.4535	0.4685	0.5075	0.4819	0.4665	0.4734	0.4732	0.4702	0.4372	0.5022	0.486	0.4905	0.4878	0.4466	0.4738	0.4574	0.4804	0.4971	0.4867	0.4791	0.4908	0.4735	0.4917
B262	979.227	0.478976	0.0209132	0.4503	0.4727	0.4851	0.4594	0.4874	0.4533	0.4875	0.4465	0.5064	0.461	0.4786	0.5034	0.4682	0.4916	0.4906	0.4947	0.4822	0.4707	0.497	0.4671	0.4759	0.4751	0.4531	0.4555	0.4708	0.508	0.4843	0.465	0.4755	0.4728	0.4712	0.4397	0.5055	0.49	0.4967	0.4915	0.45	0.4738	0.4548	0.4785	0.4952	0.4907	0.483	0.4914	0.4746	0.4956
B263	981.448	0.481737	0.0199206	0.4565	0.4749	0.4889	0.4669	0.4825	0.4563	0.4942	0.4513	0.5064	0.4622	0.4837	0.5006	0.4689	0.4927	0.4978	0.4992	0.4843	0.4767	0.4943	0.4732	0.4812	0.4813	0.457	0.4602	0.4746	0.5057	0.4883	0.4686	0.4766	0.4769	0.4717	0.4462	0.5125	0.4916	0.5014	0.4904	0.4544	0.4762	0.4574	0.4788	0.5019	0.4944	0.4891	0.4886	0.4749	0.5001
B264	983.669	0.482379	0.0193006	0.4603	0.479	0.4863	0.4679	0.4839	0.4592	0.4971	0.4517	0.5095	0.4623	0.4885	0.5024	0.4698	0.4888	0.4947	0.4971	0.4845	0.4775	0.4921	0.4731	0.4834	0.4821	0.4595	0.4664	0.4758	0.5065	0.4864	0.4715	0.478	0.473	0.4699	0.4515	0.5145	0.4939	0.5037	0.4941	0.4541	0.4759	0.458	0.477	0.5022	0.4954	0.4909	0.4882	0.4782	0.4974
B265	985.89	0.483806	0.0184398	0.4581	0.4849	0.4857	0.4678	0.4858	0.4662	0.5016	0.4592	0.5097	0.4626	0.4869	0.5085	0.4733	0.4876	0.4984	0.4962	0.4839	0.4809	0.4952	0.4829	0.4894	0.4801	0.4586	0.4715	0.4746	0.5048	0.4926	0.4727	0.4813	0.4747	0.4723	0.4554	0.5145	0.4999	0.5053	0.4926	0.4589	0.4694	0.4639	0.477	0.5031	0.4971	0.4872	0.49	0.4823	0.4948
B266	988.111	0.48412	0.018052	0.4553	0.4822	0.4863	0.4685	0.4889	0.4684	0.5055	0.4597	0.5115	0.4634	0.4863	0.51	0.4798	0.4864	0.4953	0.4983	0.4813	0.482	0.497	0.4839	0.4903	0.4812	0.4573	0.4715	0.472	0.5066	0.4952	0.4713	0.4849	0.471	0.4747	0.4606	0.5129	0.4991	0.5046	0.4947	0.457	0.4714	0.4645	0.4803	0.5041	0.4978	0.4824	0.4854	0.4859	0.4892
B267	990.332	0.485979	0.0175963	0.456	0.4828	0.4856	0.4732	0.4948	0.4721	0.5096	0.4608	0.515	0.4651	0.4901	0.5138	0.4823	0.4858	0.4893	0.4965	0.4758	0.4882	0.498	0.4815	0.49	0.4848	0.4581	0.4718	0.4713	0.5102	0.4985	0.4771	0.4815	0.4722	0.4781	0.4656	0.5147	0.5009	0.5024	0.4967	0.4607	0.476	0.4725	0.4851	0.5096	0.4957	0.4803	0.4875	0.4879	0.491
B268	992.553	0.48773	0.0175994	0.4572	0.482	0.4861	0.4741	0.5011	0.4752	0.5119	0.4607	0.5185	0.4677	0.4922	0.5154	0.4849	0.4873	0.4902	0.4943	0.4737	0.4925	0.4988	0.4826	0.4919	0.4873	0.4624	0.4762	0.4719	0.5136	0.4978	0.4816	0.4791	0.4715	0.4829	0.4677	0.5124	0.5029	0.5021	0.5018	0.461	0.4736	0.476	0.4897	0.5122	0.4961	0.4804	0.4891	0.4915	0.4897
B269	994.774	0.490844	0.017338	0.4594	0.4836	0.491	0.4801	0.5056	0.4781	0.5149	0.4675	0.5204	0.4719	0.493	0.5167	0.4877	0.4913	0.4931	0.4958	0.474	0.4927	0.5032	0.4809	0.4951	0.4906	0.4713	0.479	0.475	0.5224	0.4987	0.4847	0.4785	0.476	0.4862	0.4715	0.5157	0.5032	0.505	0.5027	0.4594	0.4764	0.4752	0.494	0.5157	0.4982	0.4813	0.4932	0.4951	0.4926
B270	996.995	0.492861	0.0175854	0.4595	0.4845	0.4911	0.4811	0.5127	0.4795	0.5128	0.4695	0.5233	0.4717	0.4944	0.5185	0.4871	0.4972	0.5001	0.4957	0.4836	0.4915	0.5108	0.4794	0.4974	0.49	0.4804	0.4842	0.476	0.5328	0.498	0.4855	0.4796	0.4763	0.4911	0.4717	0.5174	0.5039	0.5074	0.5013	0.4609	0.4791	0.4746	0.4967	0.5109	0.4975	0.4831	0.4968	0.4952	0.4946
B271	999.216	0.495366	0.0180087	0.4618	0.4844	0.4935	0.4816	0.511	0.482	0.5089	0.4737	0.5238	0.4779	0.4939	0.5192	0.4898	0.5058	0.5084	0.4972	0.4915	0.492	0.5177	0.4797	0.5015	0.491	0.4889	0.4903	0.4773	0.543	0.496	0.489	0.4811	0.4821	0.4966	0.4716	0.5208	0.5049	0.5142	0.5029	0.4596	0.4802	0.4736	0.4978	0.5073	0.499	0.4894	0.4975	0.4971	0.4974
B272	1001.44	0.49635	0.0189595	0.4613	0.486	0.4972	0.4816	0.5082	0.482	0.5063	0.4772	0.5219	0.48	0.4938	0.5174	0.4881	0.5057	0.5119	0.4992	0.4958	0.4876	0.5255	0.4765	0.5027	0.492	0.4989	0.4922	0.4787	0.5507	0.4903	0.4902	0.4826	0.485	0.4987	0.4678	0.52	0.5052	0.5176	0.5014	0.4602	0.4791	0.4718	0.4989	0.5054	0.5017	0.4935	0.4991	0.4977	0.5019
[truncated: 24 more columns]
